# Supplementary material for: Simultaneous analyses of urinary eicosanoids and related mediators identified tetranor-prostaglandin E metabolite as a novel biomarker of diabetic nephropathy
Source: PubMed Central journal article supplement (PMC8515300; doi:10.1016/j.jlr.2021.100120), 2021-09-22
Supplement: mmc1.pdf [file mmc1.pdf]

**Supplemental Tables**

**Table S1. Clinical characteristics of participants**

|                                 |           | non-DM          | Stage 1           | Stage 2                           | Stage 3-4                            |
|---------------------------------|-----------|-----------------|-------------------|-----------------------------------|--------------------------------------|
| n                               |           | 33              | 51                | 39                                | 21                                   |
| Age, years                      |           | 55.8±9.9        | 64.1±12.0*        | 67.3±11.3*                        | 61.9±15.2*                           |
| Sex (M/F)                       |           | 16/17           | 28/23             | 26/13                             | 15/6                                 |
| SBP, mmHg                       |           | N/A             | 130.2±12.8        | 134.7±10.9                        | 135.9±16.4                           |
| DBP, mmHg                       |           | N/A             | 75.6±8.6          | 73.6±15.5                         | 74.9±14.1                            |
| HbA1c, %                        |           | 5.6±0.3         | 7.6±1.4*          | 7.7±1.1*                          | 8.0±1.6*                             |
| eGFR                            |           | 76.0±12.6       | 72.6±16.3         | 61.9±19.1* <sup>†</sup>           | 34.9±21.7* <sup>†‡</sup>             |
| μAlb, mg/gCr (median [range])   |           | 4.0 [2.1, 21.4] | 9.2 [3.7, 29.8] * | 81.7 [30.6, 281.1] * <sup>†</sup> | 859.1 [42.5, 9097.5] * <sup>†‡</sup> |
| NAG, U/gCr (median [range])     |           | 3.1 [1.2, 10.7] | 5.1 [0.0, 25.1] * | 8.3 [2.9, 49.1] * <sup>†</sup>    | 10.6 [4.9, 38.5] * <sup>†</sup>      |
| α1-MG, mg/gCr (median [range])  |           | 1.6 [0.6, 10.5] | 5.0 [0.4, 15.8] * | 9.2 [1.6, 55.0] * <sup>†</sup>    | 35.4 [6.1, 157.2] * <sup>†‡</sup>    |
| L-FABP, μg/gCr (median [range]) |           | 1.5 [0.2, 8.3]  | 1.5 [0.0, 6.7]    | 4.3 [0.0, 276.6] * <sup>†</sup>   | 43.8 [2.3, 359.4] * <sup>†‡</sup>    |
| Urinary sediment                |           |                 |                   |                                   |                                      |
| Renal tubular cells (%)         | (-)       | 33 (100.0)      | 48 ( 96.0)        | 35 ( 89.7)                        | 16 (76.2)                            |
|                                 | <1 /HPF   | 0 ( 0.0)        | 2 ( 4.0)          | 3 ( 7.7)                          | 4 (19.0)                             |
|                                 | 1≤ /HPF   | 0 ( 0.0)        | 0 ( 0.0)          | 1 ( 2.6)                          | 1 ( 4.8)                             |
| Oval fat body (%)               | (-)       | 33 (100.0)      | 50 ( 100.0)       | 39 ( 100.0)                       | 14 ( 66.7)                           |
|                                 | 1-9 /WF   | 0 ( 0.0)        | 0 ( 0.0)          | 0 ( 0.0)                          | 4 ( 19.0)                            |
|                                 | 10≤ /WF   | 0 ( 0.0)        | 0 ( 0.0)          | 0 ( 0.0)                          | 3 ( 14.3)                            |
| Hyaline casts (%)               | <10 /WF   | 33 (100.0)      | 44 ( 88.0)        | 29 ( 74.4)                        | 11 ( 52.4)                           |
|                                 | 10-49 /WF | 0 ( 0.0)        | 4 ( 8.0)          | 4 ( 10.3)                         | 6 ( 28.6)                            |
|                                 | 50≤ /WF   | 0 ( 0.0)        | 2 ( 4.0)          | 6 ( 15.4)                         | 4 ( 19.0)                            |

|                              |          |            |            |            |           |
|------------------------------|----------|------------|------------|------------|-----------|
| Epithelial casts (%)         | <5 /WF   | 33 (100.0) | 50 (100.0) | 38 (97.4)  | 20 (95.2) |
|                              | 5≤ /WF   | 0 ( 0.0)   | 0 ( 0.0)   | 1 ( 2.6)   | 1 ( 4.8)  |
| Granular casts (%)           | <5 /WF   | 33 (100.0) | 50 (100.0) | 37 (94.9)  | 16 (76.2) |
|                              | 5-29 /WF | 0 ( 0.0)   | 0 ( 0.0)   | 2 ( 5.1)   | 1 ( 4.8)  |
|                              | 30≤ /WF  | 0 ( 0.0)   | 0 ( 0.0)   | 0 ( 0.0)   | 4 (19.0)  |
| Waxy casts (%)               | (-)      | 33 (100.0) | 50 (100.0) | 39 (100.0) | 16 (76.2) |
|                              | (+)      | 0 ( 0.0)   | 0 ( 0.0)   | 0 ( 0.0)   | 5 (23.8)  |
| Fatty casts (%)              | (-)      | 33 (100.0) | 50 (100.0) | 39 (100.0) | 12 (57.1) |
|                              | (+)      | 0 ( 0.0)   | 0 ( 0.0)   | 0 ( 0.0)   | 9 (42.9)  |
| Vacuolar denatured casts (%) | (-)      | 33 (100.0) | 50 (100.0) | 39 (100.0) | 18 (85.7) |
|                              | (+)      | 0 ( 0.0)   | 0 ( 0.0)   | 0 ( 0.0)   | 3 (14.3)  |
| Comorbidities, n (%)         |          |            |            |            |           |
| Cardiovascular disease       |          | 1 ( 3.0)   | 14 (27.5)  | 9 (23.1)   | 7 (33.3)  |
| Cerebrovascular disease      |          | 0 ( 0.0)   | 4 ( 7.8)   | 5 (12.8)   | 1 ( 4.8)  |
| Hypertension                 |          | 0 ( 0.0)   | 20 (39.2)  | 22 (56.4)  | 13 (61.9) |
| Dyslipidemia                 |          | 1 ( 3.0)   | 31 (60.8)  | 21 (53.8)  | 17 (81.0) |
| Drugs in past six months     |          |            |            |            |           |
| Diabetes drugs               |          |            |            |            |           |
| Insulin                      |          | 0 ( 0.0)   | 13 (25.5)  | 11 (28.2)  | 8 (38.1)  |
| GLP-1                        |          | 0 ( 0.0)   | 2 ( 3.9)   | 1 ( 2.6)   | 4 (19.0)  |
| Biguanide                    |          | 0 ( 0.0)   | 9 (17.6)   | 10 (25.6)  | 3 (14.3)  |
| Thiazolidine                 |          | 0 ( 0.0)   | 3 ( 5.9)   | 5 (12.8)   | 0 ( 0.0)  |
| Sulphonylureas               |          | 0 ( 0.0)   | 12 (23.5)  | 14 (35.9)  | 3 (14.3)  |
| Glinides                     |          | 0 ( 0.0)   | 4 ( 7.8)   | 3 ( 7.7)   | 1 ( 4.8)  |
| DPP-4 inhibitors             |          | 0 ( 0.0)   | 26 (51.0)  | 25 (64.1)  | 13 (61.9) |
| α-GI                         |          | 0 ( 0.0)   | 8 (15.7)   | 4 (10.3)   | 4 (19.0)  |
| SGLT2 inhibitors             |          | 0 ( 0.0)   | 5 ( 9.8)   | 7 (17.9)   | 3 (14.3)  |

|                         |          |            |            |            |
|-------------------------|----------|------------|------------|------------|
| No diabetes drugs       | 0 ( 0.0) | 7 ( 13.7)  | 3 ( 7.7)   | 1 ( 4.8)   |
| Antihypertensive drugs  | 1 ( 3.0) | 23 ( 45.1) | 29 ( 74.4) |            |
| ARB/ACE inhibitors      | 0 ( 0.0) | 14 ( 27.5) | 20 ( 51.3) | 17 ( 81.0) |
| Calcium channel blocker | 1 ( 3.0) | 16 ( 31.4) | 16 ( 41.0) | 13 ( 61.9) |
| diuretics               | 0 ( 0.0) | 3 ( 5.9)   | 9 ( 23.1)  | 6 ( 28.6)  |
| β-blocker               | 0 ( 0.0) | 3 ( 5.9)   | 5 ( 12.8)  | 5 ( 23.8)  |
| Other antihypertensive  | 0 ( 0.0) | 0 ( 0.0)   | 0 ( 0.0)   | 2 ( 9.5)   |
| Lipid lowering drugs    | 1 ( 3.0) | 32 ( 62.7) | 20 ( 51.3) | 16 ( 76.2) |
| Platelet inhibitors     | 1 ( 3.0) | 7 ( 13.7)  | 12 ( 30.8) | 9 ( 42.9)  |
| Aspirin                 | 1 ( 3.0) | 4 ( 7.8)   | 9 ( 23.1)  | 7 ( 33.3)  |
| Clopidogrel sulfate     | 0 ( 0.0) | 1 ( 3.0)   | 1 ( 2.6)   | 0 ( 0.0)   |
| Others                  | 0 ( 0.0) | 2 ( 3.9)   | 2 ( 5.1)   | 2 ( 9.5)   |

---

\*:  $P < 0.05$  vs. non-DM, †:  $P < 0.05$  vs. stage 1, ‡:  $P < 0.05$  vs. stage 2

**Table S2. Lipid metabolites in a method package (Shimadzu, version 3)**

| No. | Category | Compounds                                            | IS group |
|-----|----------|------------------------------------------------------|----------|
| 1   | AA       | tetranor-PGFM                                        | 1        |
| 2   | IS       | tetranor-PGEM-d6                                     | 1        |
| 3   | AA       | tetranor-PGEM                                        | 1        |
| 4   | AA       | tetranor-PGDM                                        | 1        |
| 5   | AA       | tetranor-PGJM                                        | 1        |
| 6   | AA       | tetranor-PGAM                                        | 1        |
| 7   | AA       | 20-hydroxy-PGF2 $\alpha$ or 19-hydroxy-PGF2 $\alpha$ | 2        |
| 8   | AA       | 20-hydroxy-PGE2                                      | 2        |
| 9   | AA       | 18-carboxy-dinor-LTB4                                | 2        |
| 10  | EPA      | $\delta$ 17-6-keto-PGF1 $\alpha$                     | 2        |
| 11  | AA       | 13,14-dihydro-15-keto-tetranor-PGF1 $\beta$          | 2        |
| 12  | DGLA     | 2,3-dinor-TXB1                                       | 3        |
| 13  | AA       | 2,3-dinor-8-iso-PGF2 $\alpha$                        | 2        |
| 14  | AA       | 2,3-dinor-TXB2                                       | 3        |
| 15  | AA       | 13,14-dihydro-15-keto-tetranor-PGF1 $\alpha$         | 2        |
| 16  | EA       | 2,3-dinor-11 $\beta$ -PGF2 $\alpha$                  | 2        |
| 17  | IS       | 6-keto-PGF1 $\alpha$ -d4                             | 2        |
| 18  | AA       | 6-keto-PGF1 $\alpha$                                 | 2        |
| 19  | AA       | 13,14-dihydro-15-keto-tetranor-PGD2                  | 2        |
| 20  | EPA      | Resolvin E1                                          | 2        |
| 21  | AA       | 20-carboxy-LTB4                                      | 2        |
| 22  | EA       | PGF2 $\alpha$ -EA                                    | 2        |
| 23  | DGLA     | 6-keto-PGE1                                          | 2        |
| 24  | EA       | PGE2-EA                                              | 2        |
| 25  | EPA      | 8-iso-PGF3 $\alpha$                                  | 2        |
| 26  | EPA      | TXB3                                                 | 3        |
| 27  | AA       | 20-hydroxy-LTB4                                      | 2        |
| 28  | AA       | PGE1-EA                                              | 2        |
| 29  | AA       | 11-dehydro-2,3-dinor-TXB2                            | 2        |
| 30  | AA       | 13,14-dihydro-15-keto-tetranor-PGE2                  | 2        |
| 31  | DGLA     | 2,3-dinor-PGE1                                       | 2        |
| 32  | EA       | PGD2-EA                                              | 2        |
| 33  | AA       | 6,15-diketo-13,14-dihydro-PGF1 $\alpha$              | 2        |
| 34  | EPA      | PGF3 $\alpha$                                        | 4        |
| 35  | AA       | iPF2 $\alpha$ -IV                                    | 4        |
| 36  | AA       | 8-iso-15(R)-PGF2 $\alpha$                            | 4        |
| 37  | DGLA     | TXB1                                                 | 3        |
| 38  | AA       | 8-iso-PGF2 $\alpha$                                  | 4        |
| 39  | IS       | TXB2-d4                                              | 3        |

|    |      |                                                 |   |
|----|------|-------------------------------------------------|---|
| 40 | EPA  | 11-dehydro-TXB3                                 | 4 |
| 41 | AA   | TXB2                                            | 3 |
| 42 | EPA  | PGE3                                            | 4 |
| 43 | DGLA | 8-iso-PGF1 $\alpha$                             | 4 |
| 44 | AA   | 11 $\beta$ -PGF2 $\alpha$                       | 4 |
| 45 | AA   | 5-iPF2 $\alpha$ -VI                             | 4 |
| 46 | EPA  | PGD3                                            | 4 |
| 47 | AA   | 8-iso-15-keto-PGF2 $\alpha$                     | 4 |
| 48 | IS   | PGF2 $\alpha$ -d4                               | 4 |
| 49 | AA   | PGF2 $\alpha$                                   | 4 |
| 50 | DGLA | PGF1 $\alpha$                                   | 4 |
| 51 | AA   | 8-iso-13,14-dihydro-15-keto-PGF2 $\alpha$       | 4 |
| 52 | EPA  | LXA5                                            | 5 |
| 53 | AA   | 8-iso-PGE2                                      | 5 |
| 54 | IS   | PGE2-d4                                         | 5 |
| 55 | AA   | PGE2                                            | 5 |
| 56 | AA   | 11-dehydro-TXB2                                 | 5 |
| 57 | DGLA | 8-iso-PGE1                                      | 5 |
| 58 | AA   | 15-keto-PGF2 $\alpha$                           | 5 |
| 59 | AA   | 11 $\beta$ -PGE2                                | 5 |
| 60 | DHA  | Resolvin D3                                     | 5 |
| 61 | AA   | 5S,14R-LXB4                                     | 6 |
| 62 | AA   | PGK2                                            | 6 |
| 63 | IS   | PGD2-d4                                         | 6 |
| 64 | DGLA | PGE1                                            | 6 |
| 65 | AA   | PGD2                                            | 6 |
| 66 | DGLA | PGD1                                            | 6 |
| 67 | AA   | 15-keto-PGF1 $\alpha$                           | 6 |
| 68 | AA   | 11 $\beta$ -13,14-dihydro-15-keto-PGF2 $\alpha$ | 6 |
| 69 | AA   | 15-keto-PGE2                                    | 6 |
| 70 | DHA  | Resolvin D2                                     | 6 |
| 71 | AA   | 13,14-dihydro-PGF1 $\alpha$                     | 6 |
| 72 | DGLA | 13,14-dihydro-PGE1                              | 6 |
| 73 | AA   | 14,15-LTC4                                      | 7 |
| 74 | AA   | 13,14-dihydro-15-keto-PGF2 $\alpha$             | 6 |
| 75 | AA   | 5S,6R-LXA4                                      | 6 |
| 76 | AA   | 13,14-dihydro-15-keto-PGE2                      | 6 |
| 77 | DHA  | Resolvin D1                                     | 6 |
| 78 | AA   | 5S,6S-LXA4                                      | 6 |
| 79 | AA   | 14,15-LTE4                                      | 7 |
| 80 | ADA  | 1a,1b-dihomo-PGF2 $\alpha$                      | 6 |

|     |      |                                        |    |
|-----|------|----------------------------------------|----|
| 81  | AA   | 13,14-dihydro-15-keto-PGD2             | 6  |
| 82  | EA   | LTB4-EA                                | 6  |
| 83  | IS   | LTC4-d5                                | 7  |
| 84  | AA   | LTC4                                   | 7  |
| 85  | AA   | 11-trans-LTC4                          | 7  |
| 86  | IS   | LTD4-d5                                | 8  |
| 87  | AA   | LTD4                                   | 8  |
| 88  | DHA  | Resolvin D4                            | 9  |
| 89  | AA   | LTE4                                   | 7  |
| 90  | AA   | LTF4                                   | 7  |
| 91  | AA   | 8-iso-PGA2                             | 9  |
| 92  | DGLA | 13,14-dihydro-15-keto-PGD1             | 9  |
| 93  | AA   | 11-trans-LTD4                          | 8  |
| 94  | DGLA | 8-iso-PGA1                             | 9  |
| 95  | IS   | PGA2-d4                                | 9  |
| 96  | AA   | PGA2                                   | 9  |
| 97  | EPA  | LTB5                                   | 9  |
| 98  | AA   | PGJ2                                   | 9  |
| 99  | AA   | 11-trans-LTE4                          | 7  |
| 100 | AA   | PGB2                                   | 9  |
| 101 | DGLA | PGA1                                   | 9  |
| 102 | AA   | 8,12-iso-iPF2 $\alpha$ -VI-1,5-lactone | 10 |
| 103 | AA   | 8,15-DiHETE                            | 10 |
| 104 | EPA  | 17,18-DiHETE                           | 10 |
| 105 | AA   | 6-trans-LTB4                           | 10 |
| 106 | AA   | 5,15-DiHETE                            | 10 |
| 107 | AA   | 13,14-dihydro-15-keto-PGA2             | 10 |
| 108 | DHA  | Maresin1                               | 10 |
| 109 | IS   | LTB4 d4                                | 10 |
| 110 | AA   | LTB4                                   | 10 |
| 111 | DHA  | 10,17-DiHDHA                           | 10 |
| 112 | AA   | 13,14-dihydro-15-keto PGJ2             | 10 |
| 113 | DHA  | Resolvin D5                            | 10 |
| 114 | EPA  | 14,15-DiHETE                           | 11 |
| 115 | DHA  | 7,17-hydroxy-DPA                       | 11 |
| 116 | LA   | 12,13-DiHOME                           | 11 |
| 117 | LA   | 9,10-DiHOME                            | 11 |
| 118 | AA   | 12-keto-LTB4                           | 11 |
| 119 | EPA  | 5,6-DiHETE                             | 11 |
| 120 | AA   | tetranor-12-HETE                       | 11 |
| 121 | AA   | N-acetyl-LTE4                          | 11 |

|     |       |                           |    |
|-----|-------|---------------------------|----|
| 122 | IS    | 14,15-DiHET-d11           | 11 |
| 123 | AA    | LTB3                      | 11 |
| 124 | DHA   | 19,20-DiHDPA              | 11 |
| 125 | AA    | 14,15-DHET                | 11 |
| 126 | AA    | 12-HHT                    | 11 |
| 127 | AA    | 11,12-DHET                | 11 |
| 128 | AA    | 8,9-DHET                  | 11 |
| 129 | AA    | 20-carboxy-AA             | 11 |
| 130 | ALA   | 9-HOTrE                   | 11 |
| 131 | EA    | 14,15-EET-EA              | 11 |
| 132 | AA    | 5,6-DHET                  | 11 |
| 133 | ALA   | 13-HOTrE                  | 11 |
| 134 | EPA   | 18-HEPE                   | 11 |
| 135 | AA    | 19-HETE                   | 11 |
| 136 | AA    | 15-deoxy-delta-12,14-PGJ2 | 11 |
| 137 | AA    | 20-HETE                   | 12 |
| 138 | EA    | 11,12-EET-EA              | 12 |
| 139 | EPA   | 15-HEPE                   | 12 |
| 140 | EPA   | 11-HEPE                   | 12 |
| 141 | AA    | 18-HETE                   | 12 |
| 142 | EPA   | 8-HEPE                    | 12 |
| 143 | ALA   | 13-HpOTrE                 | 12 |
| 144 | EA    | 8,9-EET-EA                | 12 |
| 145 | EPA   | 9-HEPE                    | 12 |
| 146 | AA    | 17-HETE                   | 12 |
| 147 | EPA   | 12-HEPE                   | 12 |
| 148 | EA    | 5,6-EET-EA                | 12 |
| 149 | AA    | 16-HETE                   | 12 |
| 150 | EPA   | 5-HEPE                    | 12 |
| 151 | other | Lyso-PAF                  | 12 |
| 152 | EPA   | 15-HpEPE                  | 12 |
| 153 | LA    | 13-HODE                   | 12 |
| 154 | LA    | 9-HODE                    | 12 |
| 155 | EPA   | 12-HpEPE                  | 12 |
| 156 | DHA   | 20-HDHA                   | 12 |
| 157 | IS    | 15-HETE-d8                | 12 |
| 158 | EPA   | 5-HpEPE                   | 12 |
| 159 | AA    | 15-HETE                   | 12 |
| 160 | EPA   | 17,18-EpETE               | 12 |
| 161 | LA    | 9-HpODE                   | 12 |
| 162 | LA    | 13-KODE                   | 12 |

|     |       |                  |    |
|-----|-------|------------------|----|
| 163 | LA    | 13-HpODE         | 12 |
| 164 | DHA   | 16-HDHA          | 13 |
| 165 | DHA   | 17-HDHA          | 13 |
| 166 | LA    | 9-KODE           | 13 |
| 167 | AA    | 11-HETE          | 13 |
| 168 | DHA   | 13-HDHA          | 13 |
| 169 | DHA   | 10-HDHA          | 13 |
| 170 | AA    | 8-HETE           | 13 |
| 171 | IS    | 12-HETE-d8       | 13 |
| 172 | DHA   | 14-HDHA          | 13 |
| 173 | AA    | 15-KETE          | 13 |
| 174 | AA    | 15-HpETE         | 13 |
| 175 | EPA   | 14,15-EpETE      | 13 |
| 176 | AA    | 12-HETE          | 14 |
| 177 | DHA   | 11-HDHA          | 14 |
| 178 | DHA   | 7-HDHA           | 14 |
| 179 | AA    | 9-HETE           | 14 |
| 180 | IS    | 5-HETE-d8        | 14 |
| 181 | DHA   | 8-HDHA           | 14 |
| 182 | AA    | 5-HETE           | 14 |
| 183 | DHA   | 17-HpDHA         | 14 |
| 184 | DGLA  | 15-HETrE         | 14 |
| 185 | IS    | PAF-d4           | 15 |
| 186 | other | PAF              | 15 |
| 187 | DGLA  | 8-HETrE          | 14 |
| 188 | AA    | 12-HpETE         | 14 |
| 189 | AA    | 12-KETE          | 14 |
| 190 | AA    | 5,6-DHET-lactone | 14 |
| 191 | DHA   | 4-HDHA           | 14 |
| 192 | AA    | 5-HpETE          | 14 |
| 193 | LA    | 12,13-EpOME      | 14 |
| 194 | LA    | 9,10-EpOME       | 14 |
| 195 | DHA   | 19,20-EpDPA      | 14 |
| 196 | AA    | 14,15-EET        | 16 |
| 197 | AA    | 5-KETE           | 16 |
| 198 | other | Azelaoyl-PAF     | 15 |
| 199 | EDA   | 11-HEDE          | 16 |
| 200 | DHA   | 16,17-EpDPA      | 16 |
| 201 | EDA   | 15-HEDE          | 16 |
| 202 | IS    | 11,12-EET-d11    | 16 |
| 203 | EA    | AEA              | 17 |



|     |      |           |    |
|-----|------|-----------|----|
| 204 | AA   | 11,12-EET | 16 |
| 205 | DGLA | 5-HETrE   | 16 |
| 206 | AA   | 8,9-EET   | 16 |
| 207 | AA   | 5,6-EET   | 16 |
| 208 | EDA  | 15-KEDE   | 17 |
| 209 | IS   | OEA-d4    | 17 |
| 210 | EA   | OEA       | 17 |
| 211 | EPA  | EPA       | 18 |
| 212 | DHA  | DHA       | 18 |
| 213 | IS   | AA-d8     | 18 |
| 214 | AA   | AA        | 18 |

---

AA, arachidonic acid; ALA,  $\alpha$ -linolenic acid; EA, ethanolamide; EDA, eicosadienoic acid; EPA, eicosapentaenoic acid; DGLA, dihomo- $\gamma$ -linolenic acid; DHA, docosahexaenoic acid; IS, internal standard; LA, linoleic acid

**Table S3. Repeatability of urinary lipid extraction procedure using three SPE products**

| Description          | Strata-X         |      | Oasis PRiME HLB  |      | Monospin C18     |     |
|----------------------|------------------|------|------------------|------|------------------|-----|
|                      | mean $\pm$ SD    | CV   | mean $\pm$ SD    | CV   | mean $\pm$ SD    | CV  |
| tetranor-PGEM        | 7.12 $\pm$ 0.61  | 8.6  | 6.51 $\pm$ 0.10  | 1.5  | 6.51 $\pm$ 0.28  | 4.3 |
| tetranor-PGDM        | 6.53 $\pm$ 0.53  | 8.2  | 5.93 $\pm$ 0.22  | 3.6  | 7.20 $\pm$ 0.24  | 3.3 |
| 6-keto-PGF1 $\alpha$ | 4.57 $\pm$ 0.20  | 4.3  | 4.44 $\pm$ 0.13  | 2.8  | 4.64 $\pm$ 0.16  | 3.4 |
| TXB2                 | 26.05 $\pm$ 1.15 | 4.4  | 25.76 $\pm$ 0.35 | 1.4  | 25.12 $\pm$ 0.80 | 3.2 |
| 8-iso-PGF2 $\alpha$  | 1.57 $\pm$ 0.04  | 2.4  | 1.54 $\pm$ 0.11  | 6.9  | 1.50 $\pm$ 0.01  | 0.6 |
| PGE2                 | 1.82 $\pm$ 0.16  | 8.7  | 1.72 $\pm$ 0.09  | 5.2  | 1.82 $\pm$ 0.02  | 1.1 |
| PGD2                 | 2.60 $\pm$ 0.09  | 3.6  | 2.71 $\pm$ 0.03  | 0.9  | 2.68 $\pm$ 0.07  | 2.6 |
| 15-keto-PGE2         | 0.67 $\pm$ 0.02  | 3.4  | 0.69 $\pm$ 0.01  | 1.2  | 0.72 $\pm$ 0.03  | 4.3 |
| PGF2 $\alpha$        | 1.89 $\pm$ 0.10  | 5.0  | 1.78 $\pm$ 0.11  | 5.9  | 1.86 $\pm$ 0.07  | 3.8 |
| 11-dehydro-TXB2      | 0.39 $\pm$ 0.04  | 9.3  | 0.38 $\pm$ 0.01  | 2.6  | 0.42 $\pm$ 0.01  | 2.9 |
| PGA2                 | 0.38 $\pm$ 0.03  | 8.9  | 0.40 $\pm$ 0.02  | 3.9  | 0.41 $\pm$ 0.02  | 3.8 |
| LTB4                 | 10.49 $\pm$ 0.54 | 5.1  | 8.99 $\pm$ 0.91  | 10.2 | 11.26 $\pm$ 0.87 | 7.7 |
| LTD4                 | 0.58 $\pm$ 0.02  | 2.7  | 0.65 $\pm$ 0.03  | 5.1  | 0.61 $\pm$ 0.02  | 2.9 |
| 15-HETE              | 1.17 $\pm$ 0.17  | 14.2 | 1.23 $\pm$ 0.11  | 8.8  | 1.30 $\pm$ 0.11  | 8.3 |
| 12-HETE              | 2.97 $\pm$ 0.52  | 17.6 | 2.83 $\pm$ 0.20  | 7.0  | 3.11 $\pm$ 0.29  | 9.2 |
| 5-HETE               | 2.72 $\pm$ 0.36  | 13.1 | 2.53 $\pm$ 0.43  | 16.8 | 2.90 $\pm$ 0.16  | 5.6 |
| 11,12-EET            | 0.64 $\pm$ 0.08  | 13.1 | 0.83 $\pm$ 0.14  | 16.9 | 0.83 $\pm$ 0.08  | 9.9 |
| PAF                  | 2.17 $\pm$ 0.12  | 5.5  | 1.35 $\pm$ 0.82  | 60.3 | 2.23 $\pm$ 0.06  | 2.6 |
| AA                   | 7.58 $\pm$ 0.76  | 10.0 | 6.94 $\pm$ 0.09  | 1.3  | 7.51 $\pm$ 0.13  | 1.8 |

Data are shown as mean  $\pm$  SD of the peak area ratio to internal standard and CV [%] (n = 3).

**Table S4. Diurnal fluctuation of urinary excretion of lipid metabolites**

|               |   | peak arearatio of<br>24-hour urine | Sampling time                                                                    |       |       |       |      |      | average gap to<br>24-hour urine | coefficient of<br>variation |
|---------------|---|------------------------------------|----------------------------------------------------------------------------------|-------|-------|-------|------|------|---------------------------------|-----------------------------|
|               |   |                                    | 8-12                                                                             | 12-14 | 14-17 | 17-24 | 24-6 | 6-8  |                                 |                             |
|               |   |                                    | upper: the ratio of measured values to the values in 24-hours urine              |       |       |       |      |      |                                 |                             |
|               |   |                                    | lower: the ratio of creatinine normalized values to the values in 24-hours urine |       |       |       |      |      |                                 |                             |
| tetranor-PGEM | A | 2.61                               | 1.08                                                                             | 0.90  | 1.07  | 1.38  | 1.46 | 2.50 | 1.40                            | 0.41                        |
|               |   |                                    | 0.54                                                                             | 0.49  | 0.52  | 0.56  | 0.58 | 0.68 | 0.56                            | 0.11                        |
|               | B | 0.58                               | 1.77                                                                             | 2.36  | 1.61  | 2.97  | 2.10 | 1.64 | 2.07                            | 0.25                        |
|               |   |                                    | 2.44                                                                             | 1.95  | 1.93  | 1.72  | 1.42 | 1.07 | 1.75                            | 0.27                        |
|               | C | 2.73                               | 0.79                                                                             | 2.80  |       | 1.65  | 0.99 | 0.76 | 1.40                            | 0.62                        |
|               |   |                                    | 1.17                                                                             | 1.26  |       | 0.75  | 0.50 | 1.01 | 0.94                            | 0.33                        |
|               | D | 0.99                               | 2.48                                                                             | 1.86  | 1.42  | 0.91  | 0.94 | 2.01 | 1.61                            | 0.39                        |
|               |   |                                    | 0.98                                                                             | 0.82  | 0.78  | 0.65  | 0.79 | 1.07 | 0.85                            | 0.18                        |
|               | E | 0.37                               | 3.84                                                                             | 4.26  |       | 5.04  | 0.99 | 0.76 | 2.98                            | 0.66                        |
|               |   |                                    | 2.38                                                                             | 4.79  |       | 2.25  | 0.46 | 0.32 | 2.04                            | 0.89                        |
| tetranor-PGDM | A | 0.85                               | 0.97                                                                             | 0.84  | 1.11  | 1.33  | 1.71 | 1.91 | 1.31                            | 0.32                        |
|               |   |                                    | 0.48                                                                             | 0.46  | 0.54  | 0.54  | 0.68 | 0.52 | 0.54                            | 0.14                        |
|               | B | 0.58                               | 1.42                                                                             | 2.77  | 2.48  | 2.84  | 2.66 | 1.21 | 2.23                            | 0.32                        |
|               |   |                                    | 1.96                                                                             | 2.28  | 2.99  | 1.64  | 1.79 | 0.79 | 1.91                            | 0.38                        |
|               | C | 0.94                               | 0.34                                                                             | 1.54  |       | 1.50  | 1.32 | 0.85 | 1.11                            | 0.46                        |
|               |   |                                    | 0.51                                                                             | 0.70  |       | 0.69  | 0.66 | 1.13 | 0.74                            | 0.32                        |
|               | D | 1.00                               | 1.30                                                                             | 1.15  | 0.92  | 0.80  | 0.99 | 2.05 | 1.20                            | 0.38                        |
|               |   |                                    | 0.51                                                                             | 0.50  | 0.50  | 0.57  | 0.83 | 1.10 | 0.67                            | 0.36                        |
|               | E | 0.22                               | 11.95                                                                            | 6.90  |       | 7.33  | 2.76 | 2.00 | 6.19                            | 0.65                        |
|               |   |                                    | 7.40                                                                             | 7.76  |       | 3.27  | 1.29 | 0.85 | 4.11                            | 0.80                        |
| tetranor-PGAM | A | 0.16                               | 1.58                                                                             | 1.26  | 1.26  | 1.48  | 1.15 | 1.60 | 1.39                            | 0.14                        |
|               |   |                                    | 0.79                                                                             | 0.69  | 0.61  | 0.60  | 0.45 | 0.43 | 0.60                            | 0.23                        |
|               | B | 0.12                               | 1.02                                                                             | 1.62  | 1.20  | 2.03  | 2.47 | 2.52 | 1.81                            | 0.35                        |
|               |   |                                    | 1.40                                                                             | 1.34  | 1.45  | 1.18  | 1.67 | 1.65 | 1.45                            | 0.13                        |
|               | C | 0.12                               | 0.84                                                                             | 1.66  |       | 1.57  | 1.64 | 0.65 | 1.27                            | 0.38                        |
|               |   |                                    | 1.25                                                                             | 0.75  |       | 0.72  | 0.82 | 0.86 | 0.88                            | 0.24                        |
|               | D | 0.14                               | 2.19                                                                             | 1.78  | 1.39  | 0.97  | 0.52 | 0.98 | 1.31                            | 0.47                        |

|                                     |   |              |      |      |      |      |      |      |      |      |
|-------------------------------------|---|--------------|------|------|------|------|------|------|------|------|
|                                     |   |              | 0.86 | 0.78 | 0.76 | 0.69 | 0.43 | 0.52 | 0.68 | 0.24 |
|                                     | E | 0.14         | 2.91 | 1.51 |      | 1.51 | 1.51 | 1.18 | 1.72 | 0.39 |
|                                     |   |              | 1.80 | 1.69 |      | 0.68 | 0.71 | 0.50 | 1.08 | 0.58 |
| 13,14-dihydro-15-keto-PGF1 $\alpha$ | A | 0.17         | 1.16 | 1.12 | 0.81 | 0.79 | 0.95 | 0.96 | 0.97 | 0.16 |
|                                     |   |              | 0.58 | 0.62 | 0.40 | 0.32 | 0.37 | 0.26 | 0.42 | 0.34 |
|                                     | B | 0.28         | 2.53 | 2.04 | 0.90 | 0.90 | 0.88 | 0.99 | 1.37 | 0.53 |
|                                     |   |              | 3.50 | 1.68 | 1.08 | 0.52 | 0.59 | 0.65 | 1.34 | 0.86 |
|                                     | C | 0.19         | 0.58 | 2.26 |      | 0.70 | 1.94 | 0.52 | 1.20 | 0.70 |
|                                     |   |              | 0.86 | 1.02 |      | 0.32 | 0.97 | 0.68 | 0.77 | 0.37 |
|                                     | D | 0.42         | 0.93 | 0.41 | 0.35 | 0.71 | 2.15 | 1.21 | 0.96 | 0.69 |
|                                     |   |              | 0.36 | 0.18 | 0.19 | 0.51 | 1.79 | 0.65 | 0.61 | 0.99 |
|                                     | E | 0.60         | 2.55 | 1.59 |      | 2.42 | 1.91 | 1.01 | 1.90 | 0.33 |
|                                     |   |              | 1.58 | 1.78 |      | 1.08 | 0.89 | 0.43 | 1.15 | 0.47 |
| 13,14-dihydro-15-keto-tetranor-PGD2 | A | 0.44         | 0.89 | 0.79 | 1.29 | 1.47 | 1.54 | 2.54 | 1.42 | 0.44 |
|                                     |   |              | 0.44 | 0.43 | 0.63 | 0.60 | 0.61 | 0.69 | 0.57 | 0.18 |
|                                     | B | not detected |      |      |      |      |      |      |      |      |
|                                     | C | 0.61         | 0.24 | 1.91 |      | 1.00 | 0.92 | 0.29 | 0.87 | 0.78 |
|                                     |   |              | 0.35 | 0.86 |      | 0.46 | 0.46 | 0.39 | 0.50 | 0.41 |
|                                     | D | 0.52         | 1.96 | 1.13 | 0.85 | 0.59 | 0.77 | 1.80 | 1.18 | 0.48 |
|                                     |   | 0.77         | 0.50 | 0.46 | 0.42 | 0.64 | 0.96 | 0.63 | 0.33 |      |
|                                     | E | 0.27         | 1.61 | 4.72 |      | 4.06 | 2.62 | 2.54 | 3.11 | 0.40 |
|                                     |   |              | 1.00 | 5.30 |      | 1.81 | 1.22 | 1.08 | 2.08 | 0.88 |
| 13,14-dihydro-15-keto-tetranor-PGE2 | A | 1.81         | 0.62 | 0.58 | 0.73 | 1.19 | 2.23 | 3.41 | 1.46 | 0.78 |
|                                     |   |              | 0.31 | 0.32 | 0.36 | 0.48 | 0.88 | 0.92 | 0.55 | 0.52 |
|                                     | B | 0.46         | 0.78 | 2.27 | 1.56 | 2.56 | 2.55 | 1.43 | 1.86 | 0.39 |
|                                     |   |              | 1.07 | 1.87 | 1.87 | 1.48 | 1.72 | 0.93 | 1.49 | 0.27 |
|                                     | C | 3.48         | 0.18 | 1.26 |      | 1.66 | 1.70 | 0.68 | 1.10 | 0.60 |
|                                     |   |              | 0.26 | 0.57 |      | 0.76 | 0.85 | 0.90 | 0.67 | 0.39 |
|                                     | D | 2.69         | 1.37 | 1.01 | 0.76 | 0.63 | 0.80 | 1.79 | 1.06 | 0.42 |
|                                     |   |              | 0.54 | 0.45 | 0.41 | 0.45 | 0.67 | 0.95 | 0.58 | 0.36 |
|                                     | E | 0.54         | 2.78 | 3.91 |      | 3.62 | 5.00 | 5.26 | 4.12 | 0.25 |
|                                     |   |              | 1.72 | 4.40 |      | 1.61 | 2.34 | 2.24 | 2.46 | 0.46 |
| PGF2 $\alpha$                       | A | 0.06         | 0.69 | 0.55 | 0.00 | 0.89 | 0.00 | 1.23 | 0.56 | 0.87 |



|             |   |      |      |      |      |      |      |      |      |      |
|-------------|---|------|------|------|------|------|------|------|------|------|
|             |   |      | 0.92 | 0.39 |      | 0.90 | 0.74 | 0.87 | 0.76 | 0.29 |
|             | D | 0.02 | 3.04 | 2.17 | 1.51 | 0.93 | 0.61 | 1.25 | 1.58 | 0.56 |
|             |   |      | 1.19 | 0.95 | 0.82 | 0.67 | 0.50 | 0.67 | 0.80 | 0.31 |
|             | E | 0.01 | 2.88 | 3.37 |      | 3.29 | 5.23 | 1.81 | 3.32 | 0.37 |
|             |   |      | 1.79 | 3.78 |      | 1.47 | 2.44 | 0.77 | 2.05 | 0.56 |
| Maresin1    | A | 0.31 | 0.93 | 0.80 | 0.55 | 0.60 | 0.91 | 2.75 | 1.09 | 0.76 |
|             |   |      | 0.46 | 0.44 | 0.27 | 0.24 | 0.36 | 0.75 | 0.42 | 0.44 |
|             | B | 0.08 | 0.00 | 0.00 | 0.00 | 0.00 | 2.52 | 1.98 | 0.75 | 1.57 |
|             |   |      | 0.00 | 0.00 | 0.00 | 0.00 | 1.70 | 1.30 | 0.50 | 1.57 |
|             | C | 0.12 | 0.00 | 0.00 |      | 0.00 | 0.00 | 0.71 |      |      |
|             |   |      | 0.00 | 0.00 |      | 0.00 | 0.00 | 0.94 |      |      |
|             | D | 0.49 | 1.12 | 2.77 | 2.22 | 1.23 | 0.53 | 1.35 | 1.53 | 0.53 |
|             |   |      | 0.44 | 1.21 | 1.21 | 0.88 | 0.44 | 0.72 | 0.82 | 0.43 |
|             | E | 0.28 | 0.99 | 2.17 |      | 3.84 | 3.52 | 2.30 | 2.56 | 0.45 |
|             |   |      | 0.62 | 2.44 |      | 1.71 | 1.64 | 0.98 | 1.48 | 0.48 |
| 9,10-DiHOME | A | 0.09 | 1.22 | 0.79 | 0.22 | 2.35 | 1.76 | 0.64 | 1.16 | 0.67 |
|             |   |      | 0.61 | 0.44 | 0.11 | 0.95 | 0.69 | 0.17 | 0.49 | 0.65 |
|             | B | 0.05 | 3.66 | 1.06 | 0.49 | 0.37 | 1.24 | 0.54 | 1.23 | 1.01 |
|             |   |      | 5.05 | 0.88 | 0.59 | 0.21 | 0.84 | 0.35 | 1.32 | 1.40 |
|             | C | 0.01 | 0.22 | 1.76 |      | 0.39 | 3.56 | 0.46 | 1.28 | 1.11 |
|             |   |      | 0.33 | 0.79 |      | 0.18 | 1.79 | 0.61 | 0.74 | 0.86 |
|             | D | 0.05 | 5.18 | 0.60 | 1.12 | 1.12 | 2.59 | 1.31 | 1.99 | 0.86 |
|             |   |      | 2.04 | 0.26 | 0.61 | 0.80 | 2.16 | 0.70 | 1.10 | 0.73 |
|             | E | 0.05 | 6.98 | 5.69 |      | 6.68 | 2.16 | 2.36 | 4.77 | 0.49 |
|             |   |      | 4.33 | 6.39 |      | 2.98 | 1.01 | 1.00 | 3.14 | 0.73 |
| Lyso-PAF    | A | 0.58 | 1.88 | 1.60 | 1.59 | 1.49 | 1.39 | 1.43 | 1.56 | 0.11 |
|             |   |      | 0.94 | 0.88 | 0.77 | 0.60 | 0.55 | 0.39 | 0.69 | 0.31 |
|             | B | 0.26 | 1.76 | 2.49 | 2.24 | 2.31 | 2.22 | 2.01 | 2.17 | 0.12 |
|             |   |      | 2.43 | 2.06 | 2.69 | 1.34 | 1.49 | 1.31 | 1.89 | 0.31 |
|             | C | 0.31 | 1.33 | 1.13 |      | 1.40 | 1.55 | 1.11 | 1.30 | 0.14 |
|             |   |      | 1.98 | 0.51 |      | 0.64 | 0.78 | 1.47 | 1.07 | 0.58 |
|             | D | 0.33 | 1.08 | 1.37 | 0.96 | 0.89 | 0.93 | 0.85 | 1.01 | 0.19 |
|             |   |      | 0.43 | 0.60 | 0.53 | 0.63 | 0.78 | 0.46 | 0.57 | 0.23 |
|             | E | 0.16 | 3.87 | 1.90 |      | 2.05 | 1.86 | 1.53 | 2.24 | 0.42 |

|      |       |       |      |      |      |      |      |      |      |      |
|------|-------|-------|------|------|------|------|------|------|------|------|
|      |       |       | 2.40 | 2.13 |      | 0.92 | 0.87 | 0.65 | 1.39 | 0.58 |
| OEA  | A     | 0.006 | 2.93 | 1.31 | 4.93 | 1.15 | 2.19 | 1.65 | 2.36 | 0.60 |
|      |       |       | 1.46 | 0.72 | 2.40 | 0.47 | 0.86 | 0.45 | 1.06 | 0.71 |
|      | B     | 0.003 | 1.50 | 3.92 | 2.71 | 1.98 | 6.80 | 2.72 | 3.27 | 0.59 |
|      |       |       | 2.07 | 3.23 | 3.26 | 1.15 | 4.58 | 1.78 | 2.68 | 0.47 |
|      | C     | 0.006 | 0.76 | 1.29 |      | 0.79 | 1.31 | 5.65 | 1.96 | 1.06 |
| 1.13 |       |       | 0.58 |      | 0.36 | 0.66 | 7.49 | 2.04 | 1.49 |      |
| D    | 0.051 | 0.18  | 0.15 | 0.35 | 0.42 | 3.74 | 1.20 | 1.01 | 1.38 |      |
|      |       | 0.07  | 0.06 | 0.19 | 0.30 | 3.12 | 0.64 | 0.73 | 1.62 |      |
| E    | 0.034 | 0.30  | 0.16 |      | 0.31 | 0.19 | 0.12 | 0.22 | 0.39 |      |
|      |       | 0.18  | 0.18 |      | 0.14 | 0.09 | 0.05 | 0.13 | 0.45 |      |
| DHA  | A     | 0.03  | 1.93 | 1.50 | 1.24 | 1.41 | 2.96 | 1.16 | 1.70 | 0.40 |
|      |       |       | 0.96 | 0.82 | 0.60 | 0.57 | 1.17 | 0.31 | 0.74 | 0.41 |
|      | B     | 0.03  | 1.20 | 0.87 | 0.00 | 1.25 | 0.74 | 0.00 | 0.68 | 0.83 |
|      |       |       | 1.66 | 0.72 | 0.00 | 0.72 | 0.50 | 0.00 | 0.60 | 1.02 |
|      | C     | 0.02  | 0.74 | 0.73 |      | 2.49 | 2.46 | 1.30 | 1.54 | 0.57 |
| 1.10 |       |       | 0.33 |      | 1.14 | 1.24 | 1.72 | 1.10 | 0.45 |      |
| D    | 0.03  | 1.11  | 0.79 | 0.96 | 1.58 | 1.64 | 1.94 | 1.34 | 0.34 |      |
|      |       | 0.43  | 0.35 | 0.52 | 1.13 | 1.37 | 1.04 | 0.81 | 0.53 |      |
| E    | 0.02  | 1.23  | 1.41 |      | 1.25 | 2.24 | 1.45 | 1.51 | 0.27 |      |
|      |       | 0.76  | 1.58 |      | 0.56 | 1.04 | 0.62 | 0.91 | 0.46 |      |

Data are shown as peak area ratio in 24-hour urine ( /day), the ratio of measured values to the values in 24-hour urine (upper row) and the ratio of creatinine normalized values to the values in 24-hour urine (lower row).

**Table S5. Stratified analysis for the metabolites by RAS inhibitors**

|                                     |     | non-DM              | stage 1               | stage 2               | stage 3-4                         |
|-------------------------------------|-----|---------------------|-----------------------|-----------------------|-----------------------------------|
| n                                   | yes | 0                   | 14                    | 20                    | 17                                |
|                                     | no  | 33                  | 37                    | 19                    | 4                                 |
| tetranor-PGEM                       | yes | -                   | 17.17 [11.20, 41.17]  | 31.79 [20.45, 44.87]  | 42.61 [34.79, 52.67] <sup>†</sup> |
|                                     | no  | 12.51 [7.96, 17.75] | 19.03 [10.33, 28.33]* | 27.58 [23.76, 41.90]* | 31.69 [24.51, 37.36]*             |
| 13,14-dihydro-15-keto-tetranor-PGE2 | yes | -                   | 7.69 [4.47, 11.50]    | 10.42 [5.87, 15.33]   | 7.09 [2.40, 15.06]                |
|                                     | no  | 13.06 [9.45, 28.31] | 5.70 [3.24, 12.59]*   | 7.36 [5.02, 11.55]*   | 7.92 [5.14, 10.00]                |
| PGE2                                | yes | -                   | 0.12 [0.00, 0.17]     | 0.10 [0.00, 0.20]     | 0.17 [0.10, 0.40]                 |
|                                     | no  | 0.00 [0.00, 0.00]   | 0.06 [0.00, 0.12]*    | 0.08 [0.00, 0.15]     | 0.14 [0.09, 0.26]                 |
| 13,14-dihydro-15-keto-PGE2          | yes | -                   | 0.00 [0.00, 0.03]     | 0.04 [0.00, 0.09]     | 0.10 [0.00, 0.16] <sup>†</sup>    |
|                                     | no  | 0.00 [0.00, 0.00]   | 0.00 [0.00, 0.04]*    | 0.00 [0.00, 0.06]*    | 0.04 [0.04, 0.05]*                |
| 13,14-dihydro-15-keto-PGA2          | yes | -                   | 0.00 [0.00, 0.00]     | 0.00 [0.00, 0.00]     | 0.00 [0.00, 0.53] <sup>†</sup>    |
|                                     | no  | 0.00 [0.00, 0.00]   | 0.00 [0.00, 0.00]     | 0.00 [0.00, 0.00]*    | 0.00 [0.00, 0.16]*                |
| 8-iso-PGE2                          | yes | -                   | 0.00 [0.00, 0.07]     | 0.00 [0.00, 0.00]     | 0.00 [0.00, 0.03]                 |
|                                     | no  | 0.00 [0.00, 0.00]   | 0.00 [0.00, 0.03]*    | 0.00 [0.00, 0.00]     | 0.00 [0.00, 0.01]*                |
| 5-iPF2 $\alpha$ -VI                 | yes | -                   | 0.47 [0.29, 0.67]     | 0.38 [0.25, 0.57]     | 0.16 [0.00, 0.40] <sup>† ‡</sup>  |



|                 |     |                     |                     |                                |                                  |
|-----------------|-----|---------------------|---------------------|--------------------------------|----------------------------------|
|                 | no  | 0.53 [0.42, 0.77]   | 0.50 [0.30, 0.76]   | 0.47 [0.31, 0.64]              | 0.05 [0.00, 0.26]                |
| 11-dehydro-TXB2 | yes | -                   | 0.16 [0.02, 0.24]   | 0.19 [0.13, 0.24]              | 0.08 [0.07, 0.21]                |
|                 | no  | 0.14 [0.08, 0.22]   | 0.17 [0.12, 0.26]   | 0.24 [0.13, 0.41]              | 0.11 [0.09, 0.14]                |
| 2,3-dinor-TXB2  | yes | -                   | 0.21 [0.13, 0.43]   | 0.63 [0.08, 3.16]              | 0.05 [0.00, 0.11] <sup>‡</sup>   |
|                 | no  | 0.12 [0.06, 0.44]   | 0.14 [0.00, 0.71]   | 0.26 [0.05, 0.74]              | 0.09 [0.00, 0.18]                |
| PGD2            | yes | -                   | 0.11 [0.00, 0.17]   | 0.04 [0.00, 0.15]              | 0.16 [0.00, 0.24]                |
|                 | no  | 0.00 [0.00, 0.00]   | 0.07 [0.00, 0.25]   | 0.00 [0.00, 0.20]              | 0.11 [0.08, 0.20]                |
| LTB4-EA         | yes | -                   | 0.18 [0.09, 0.32]   | 0.24 [0.08, 0.38]              | 0.20 [0.07, 0.25]                |
|                 | no  | 0.32 [0.17, 0.48]   | 0.31 [0.15, 0.53]   | 0.31 [0.20, 0.52]              | 0.08 [0.05, 0.16]                |
| Maresin1        | yes | -                   | 11.01 [7.83, 21.48] | 16.44 [7.75, 24.87]            | 2.78 [0.83, 7.13] <sup>† ‡</sup> |
|                 | no  | 11.50 [6.27, 20.71] | 10.89 [3.75, 21.00] | 11.06 [6.69, 20.53]            | 2.01 [0.83, 6.81]                |
| 9,10-DiHOME     | yes | -                   | 0.20 [0.09, 0.30]   | 0.54 [0.31, 0.77] <sup>†</sup> | 0.22 [0.16, 0.87]                |
|                 | no  | 0.47 [0.16, 1.19]   | 0.12 [0.03, 0.36]*  | 0.47 [0.19, 0.77] <sup>†</sup> | 0.43 [0.20, 0.64]                |
| Lyso-PAF        | yes | -                   | 0.09 [0.06, 0.14]   | 0.21 [0.15, 0.30] <sup>†</sup> | 0.84 [0.52, 1.33] <sup>† ‡</sup> |
|                 | no  | 0.16 [0.07, 0.24]   | 0.12 [0.08, 0.20]   | 0.20 [0.12, 0.66]              | 0.42 [0.30, 0.71]                |

Data are expressed as median (ng/mgCr) and interquartile range [Q1, Q3], (n). \*: P < 0.05 vs. non-DM, † : P < 0.05 vs. stage 1, ‡ : P < 0.05 vs. stage 2, a: P < 0.05 vs.

“yes”.

**Table S6. Stratified analysis for the metabolites by platelet inhibitors**

|                                     |     | non-DM              | stage 1               | stage 2                            | stage 3-4                          |
|-------------------------------------|-----|---------------------|-----------------------|------------------------------------|------------------------------------|
| n                                   | yes | 1                   | 7                     | 12                                 | 9                                  |
|                                     | no  | 32                  | 44                    | 27                                 | 12                                 |
| tetranor-PGEM                       | yes | 1.76 [NA]           | 19.90 [7.89, 44.74]   | 24.07 [19.28, 42.26]               | 36.59 [30.36, 48.29]               |
|                                     | no  | 12.79 [8.17, 17.87] | 19.00 [10.86, 31.59]* | 30.44 [24.13, 43.23]* <sup>†</sup> | 40.81 [36.30, 51.74]* <sup>†</sup> |
| 13,14-dihydro-15-keto-tetranor-PGE2 | yes | 4.35 [4.35, 4.35]   | 5.16 [3.77, 14.53]    | 6.50 [3.73, 12.49]                 | 2.40 [1.73, 15.06]                 |
|                                     | no  | 13.46 [9.66, 28.49] | 5.90 [3.86, 11.82]*   | 9.43 [5.84, 14.29]                 | 8.51 [5.74, 10.31]                 |
| PGE2                                | yes | 0.30 [0.30, 0.30]   | 0.13 [0.06, 0.19]     | 0.05 [0.00, 0.13]                  | 0.15 [0.12, 0.21]                  |
|                                     | no  | 0.00 [0.00, 0.00]   | 0.06 [0.00, 0.13]*    | 0.09 [0.00, 0.20]*                 | 0.17 [0.09, 0.43]* <sup>†</sup>    |
| 13,14-dihydro-15-keto-PGE2          | yes | 0.00 [0.00, 0.00]   | 0.00 [0.00, 0.02]     | 0.03 [0.00, 0.08]                  | 0.04 [0.00, 0.06]                  |
|                                     | no  | 0.00 [0.00, 0.00]   | 0.00 [0.00, 0.04]*    | 0.00 [0.00, 0.09]*                 | 0.10 [0.04, 0.13]* <sup>†</sup>    |
| 13,14-dihydro-15-keto-PGA2          | yes | 0.00 [0.00, 0.00]   | 0.00 [0.00, 0.00]     | 0.00 [0.00, 0.09]                  | 0.00 [0.00, 0.49]                  |
|                                     | no  | 0.00 [0.00, 0.00]   | 0.00 [0.00, 0.00]     | 0.00 [0.00, 0.00]                  | 0.00 [0.00, 0.57]*                 |
| 8-iso-PGE2                          | yes | 0.00 [0.00, 0.00]   | 0.06 [0.00, 0.09]     | 0.00 [0.00, 0.00]                  | 0.00 [0.00, 0.03]                  |
|                                     | no  | 0.00 [0.00, 0.00]   | 0.00 [0.00, 0.01]     | 0.00 [0.00, 0.00]                  | 0.00 [0.00, 0.00]                  |
| 5-iPF2 $\alpha$ -VI                 | yes | 0.90 [0.90, 0.90]   | 0.52 [0.29, 0.65]     | 0.26 [0.21, 0.36]                  | 0.11 [0.00, 0.16] <sup>†</sup>     |

|                 |     |                      |                     |                                 |                                  |
|-----------------|-----|----------------------|---------------------|---------------------------------|----------------------------------|
|                 | no  | 0.52 [0.41, 0.75]    | 0.48 [0.30, 0.76]   | 0.48 [0.37, 0.63] <sup>a</sup>  | 0.31 [0.00, 0.52]                |
| 11-dehydro-TXB2 | yes | 0.00 [0.00, 0.00]    | 0.08 [0.00, 0.16]   | 0.15 [0.09, 0.20]               | 0.07 [0.00, 0.08] <sup>‡</sup>   |
|                 | no  | 0.15 [0.10, 0.22]    | 0.18 [0.12, 0.25]   | 0.24 [0.16, 0.39]* <sup>a</sup> | 0.17 [0.13, 0.25] <sup>a</sup>   |
| 2,3-dinor-TXB2  | yes | 0.00 [0.00, 0.00]    | 0.13 [0.00, 0.59]   | 0.34 [0.08, 0.67]               | 0.00 [0.00, 0.08]                |
|                 | no  | 0.13 [0.06, 0.46]    | 0.19 [0.05, 0.61]   | 0.51 [0.08, 3.75]               | 0.08 [0.00, 0.24]                |
| PGD2            | yes | 0.00 [0.00, 0.00]    | 0.08 [0.00, 0.14]   | 0.13 [0.00, 0.16]               | 0.16 [0.12, 0.31]                |
|                 | no  | 0.00 [0.00, 0.00]    | 0.10 [0.00, 0.25]   | 0.00 [0.00, 0.17]               | 0.13 [0.00, 0.22]                |
| LTB4-EA         | yes | 0.39 [0.39, 0.39]    | 0.25 [0.18, 0.49]   | 0.21 [0.03, 0.66]               | 0.07 [0.00, 0.14]                |
|                 | no  | 0.31 [0.17, 0.48]    | 0.28 [0.12, 0.47]   | 0.30 [0.20, 0.39]               | 0.22 [0.09, 0.30]                |
| Maresin1        | yes | 11.28 [11.28, 11.28] | 13.88 [8.41, 27.43] | 18.70 [5.61, 22.13]             | 0.83 [0.56, 1.43] <sup>† ‡</sup> |
|                 | no  | 12.05 [6.06, 20.93]  | 10.51 [5.16, 18.46] | 11.06 [7.71, 24.02]             | 6.88 [3.36, 10.70] <sup>a</sup>  |
| 9,10-DiHOME     | yes | 0.47 [0.47, 0.47]    | 0.17 [0.06, 0.27]   | 0.56 [0.53, 0.81] <sup>†</sup>  | 0.28 [0.15, 0.64]                |
|                 | no  | 0.43 [0.16, 1.21]    | 0.14 [0.04, 0.32]*  | 0.46 [0.19, 0.73] <sup>†</sup>  | 0.22 [0.18, 1.08]                |
| Lyso-PAF        | yes | 0.38 [0.38, 0.38]    | 0.10 [0.06, 0.13]   | 0.17 [0.14, 0.26]               | 0.76 [0.48, 0.91] <sup>‡</sup>   |
|                 | no  | 0.15 [0.07, 0.22]    | 0.12 [0.08, 0.20]   | 0.23 [0.13, 0.58] <sup>†</sup>  | 0.83 [0.40, 1.63]* <sup>†</sup>  |

Data are expressed as median (ng/mgCr) and interquartile range [Q1, Q3], (n). \*: P < 0.05 vs. non-DM, †: P < 0.05 vs. stage 1, ‡: P < 0.05 vs. stage 2, a: P < 0.05 vs.

“yes”.

Fig. S1

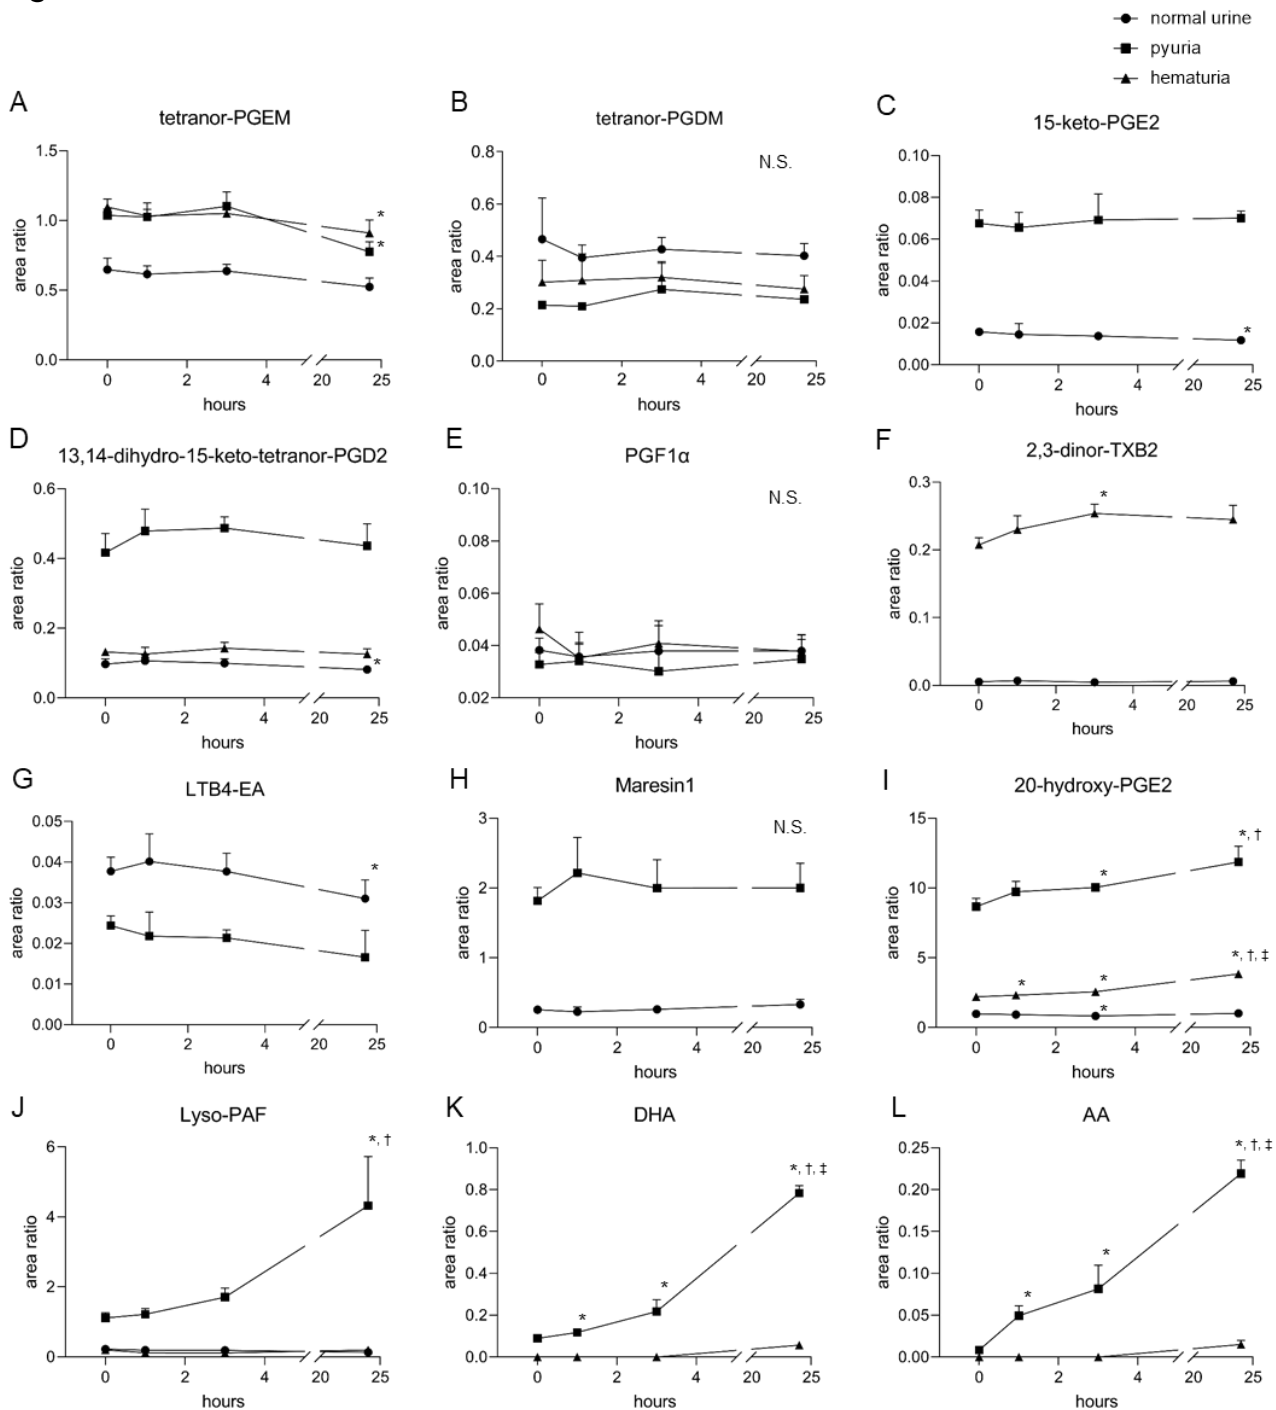

**Figure S1. Effects of incubation on urinary eicosanoids and related mediators.** We investigated the effects of incubation on the measurement of urinary eicosanoids and related mediators using three samples: normal (closed circle), pyuria (closed square), and hematuria (closed triangle). Each sample was incubated at 0, 1, 3, and 24 hours; the metabolites that were detected in the urinary samples are shown. Data are shown as the mean  $\pm$  SD of the peak area ratio ( $n = 5$ ); \* $P < 0.05$  versus 0 h, † $P < 0.05$  versus 1 h, ‡ $P < 0.05$  versus 3 h.

Fig. S2

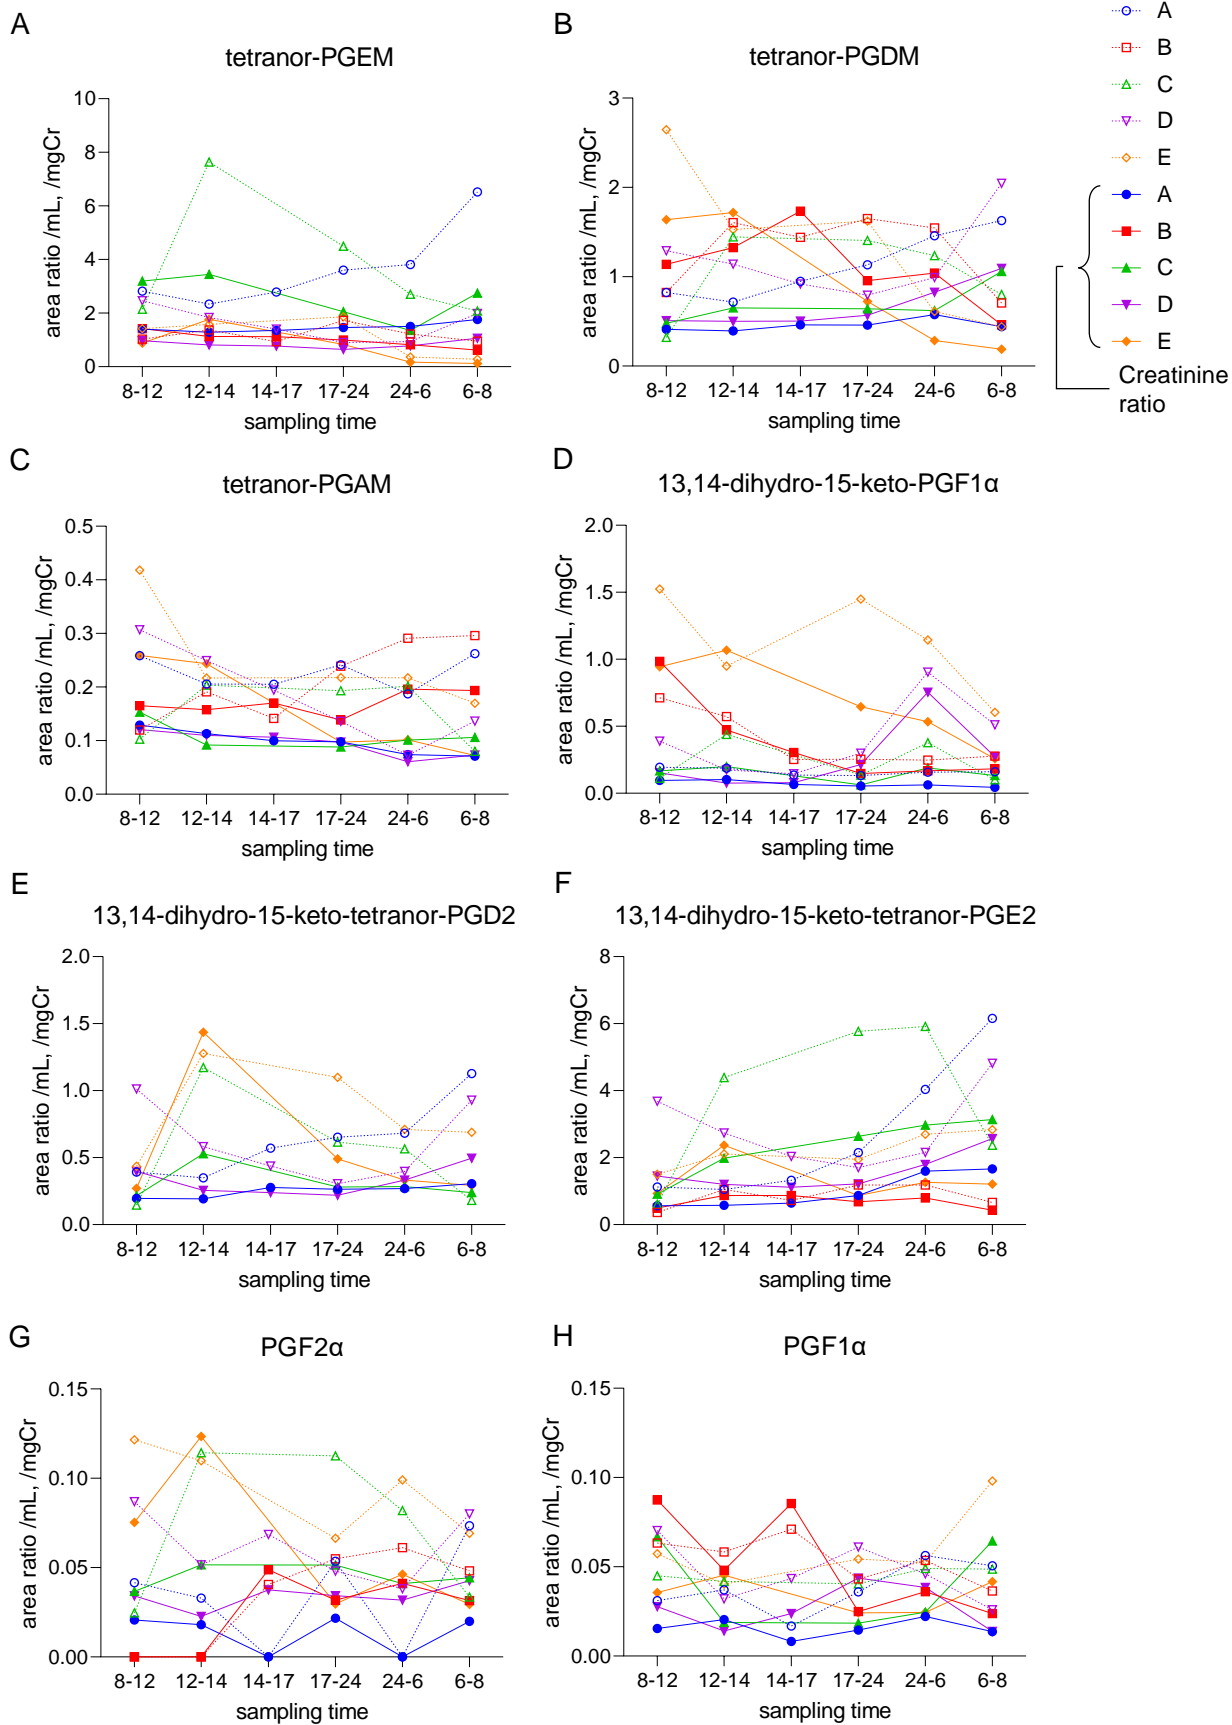

Fig. S2 (continued)

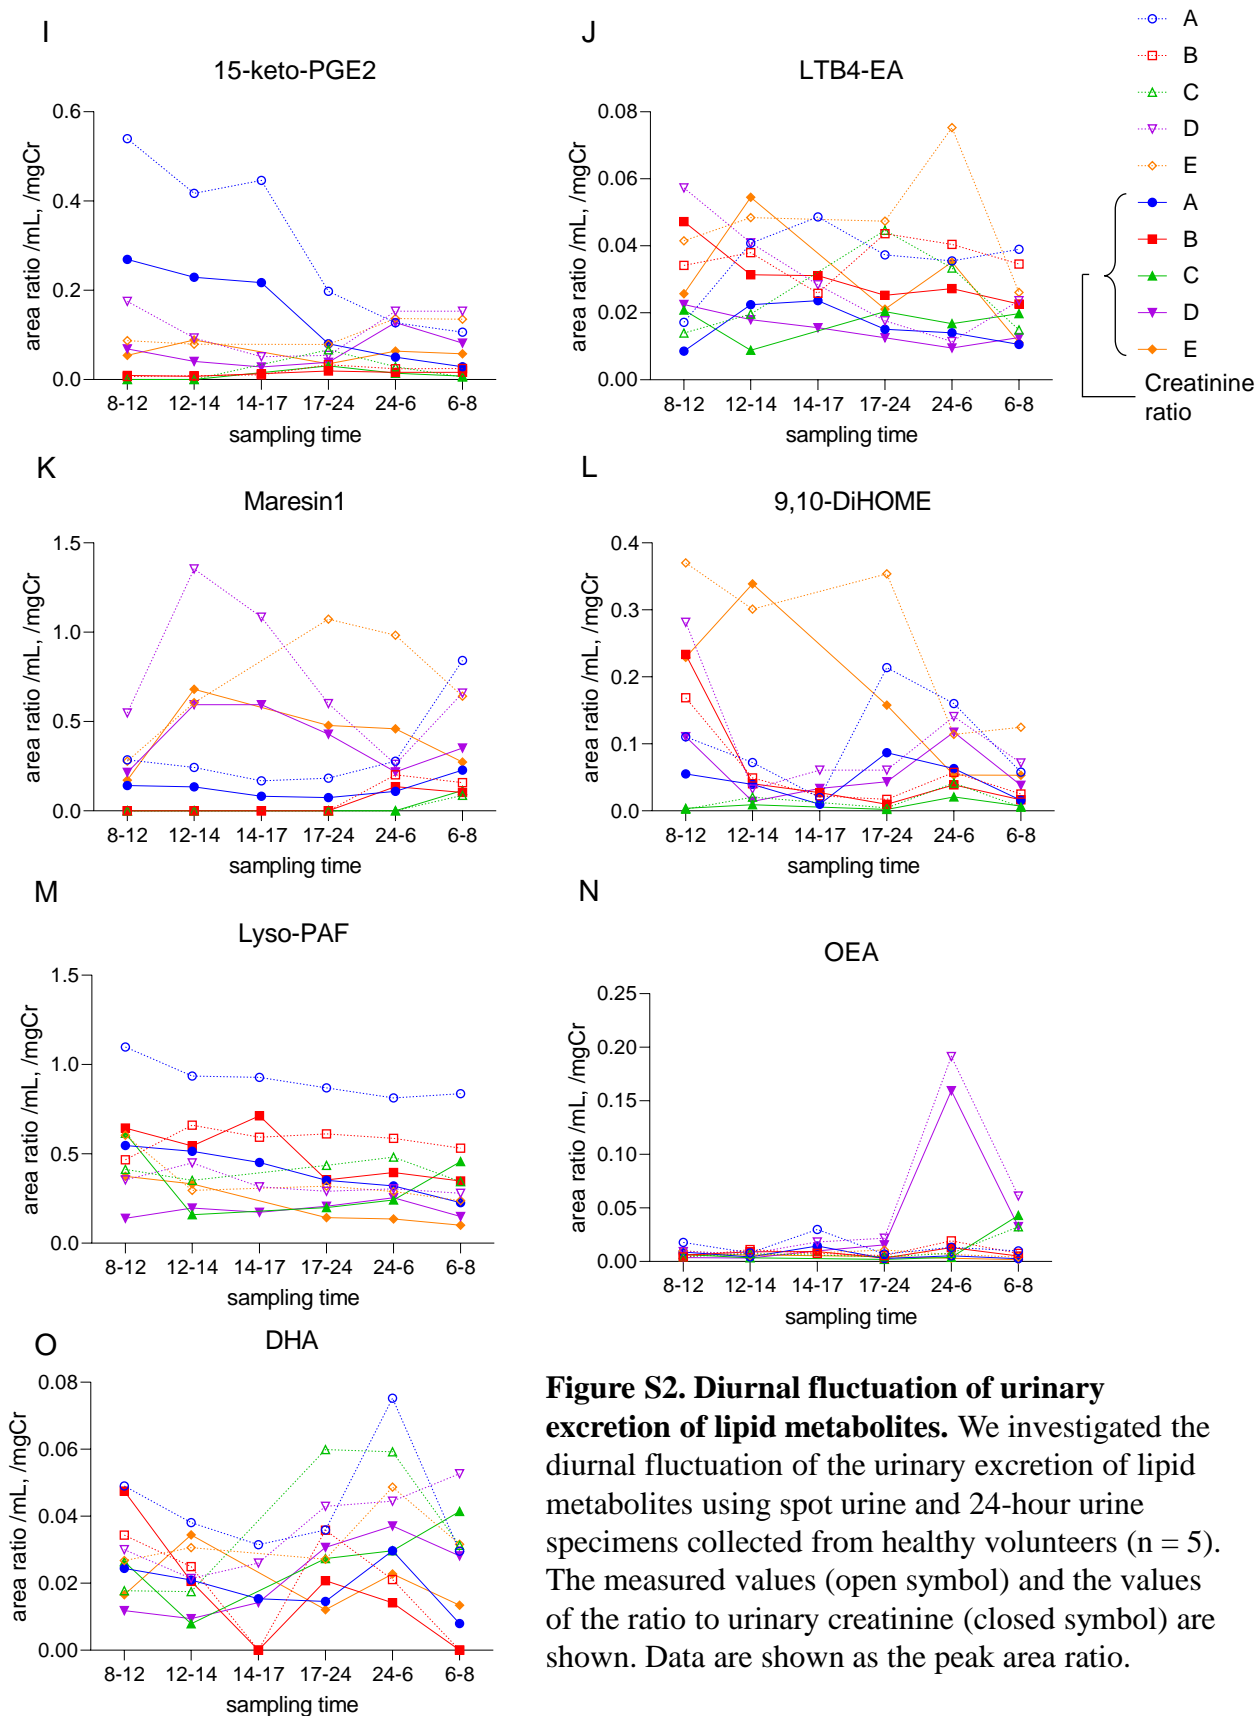

**Figure S2. Diurnal fluctuation of urinary excretion of lipid metabolites.** We investigated the diurnal fluctuation of the urinary excretion of lipid metabolites using spot urine and 24-hour urine specimens collected from healthy volunteers ( $n = 5$ ). The measured values (open symbol) and the values of the ratio to urinary creatinine (closed symbol) are shown. Data are shown as the peak area ratio.

**Fig. S3**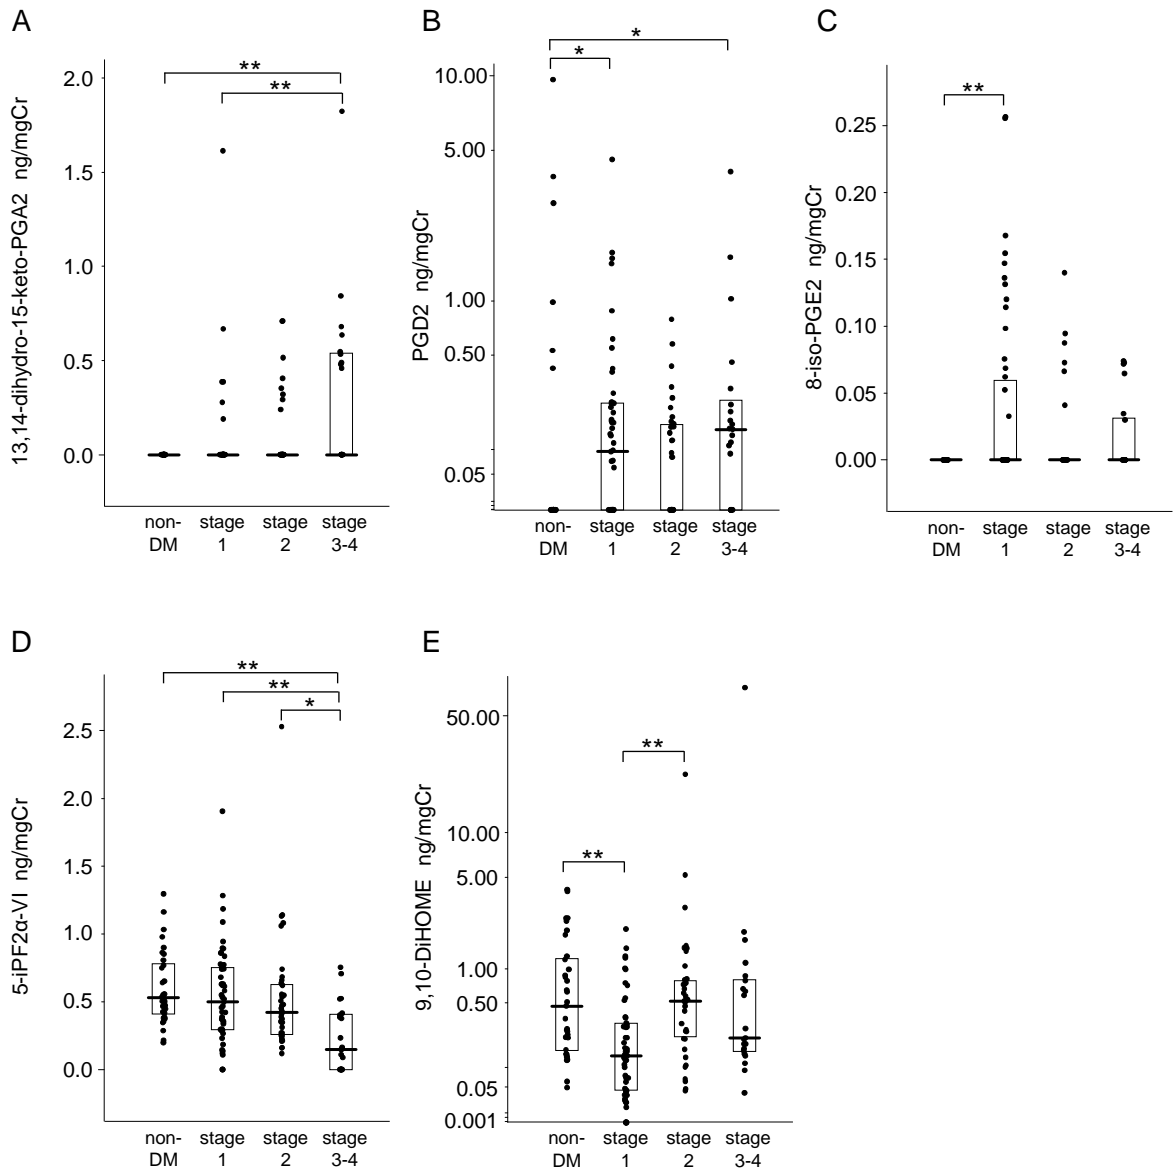

**Figure S3. Modulation of urinary eicosanoids and related mediators according to the stages of diabetic nephropathy.** We compared the urinary lipid metabolite levels between the subjects with diabetes and the control group. (A) 13,14-dihydro-15-keto-prostaglandin A2 (13,14-dihydro-15-keto-PGA2); (B) prostaglandin D2 (PGD2); (C) 8-iso-PGE2; (D) 5-isoprostane F2 $\alpha$ -VI (5-iPF2 $\alpha$ -VI); (E) 9,10-dihydroxy-12Z-octadecenoic acid (9,10-DiHOME). Data are shown as the median  $\pm$  SE, \* $P$  < 0.05, \*\* $P$  < 0.01.

Fig. S4

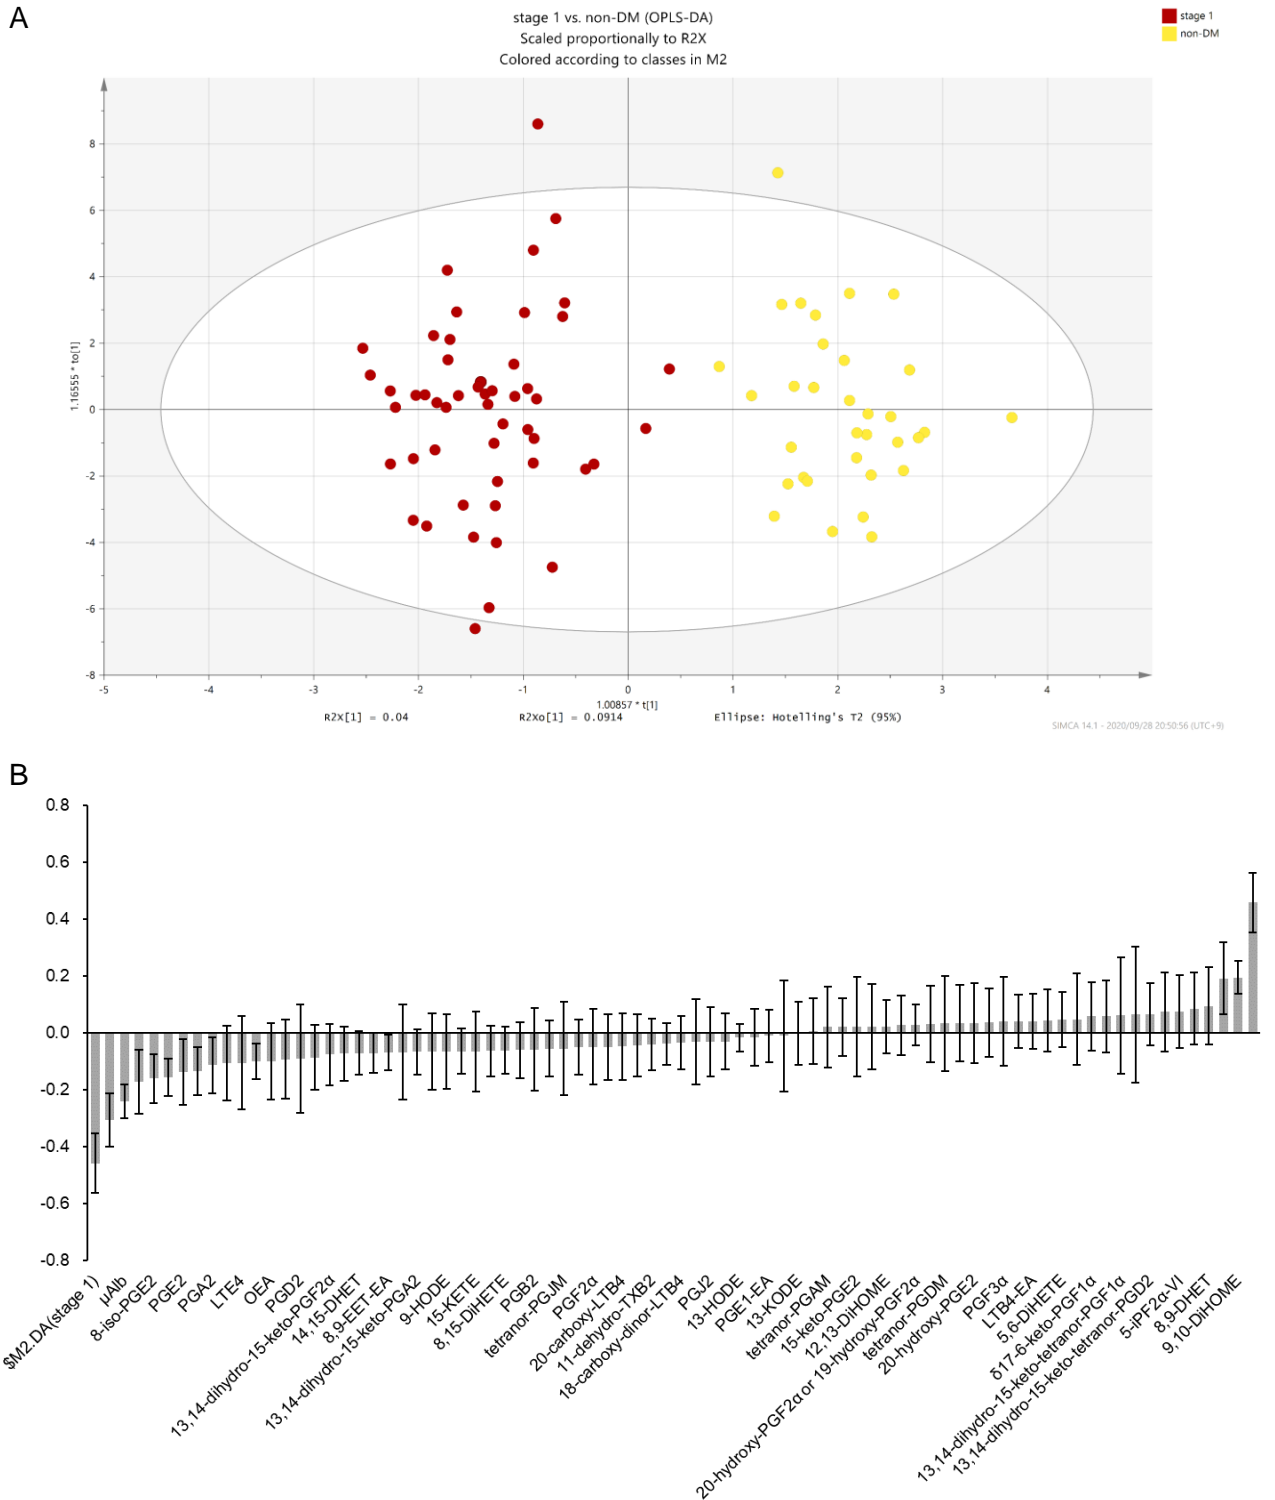

**Figure S4. OPLS analysis for metabolites with variable importance in projection in stage 1 nephropathy group versus control group.** Score scatter plot (A) and loading column plot (B) between stage 1 nephropathy group (closed red circle) and control group (closed yellow circle) were shown.



Fig. S5

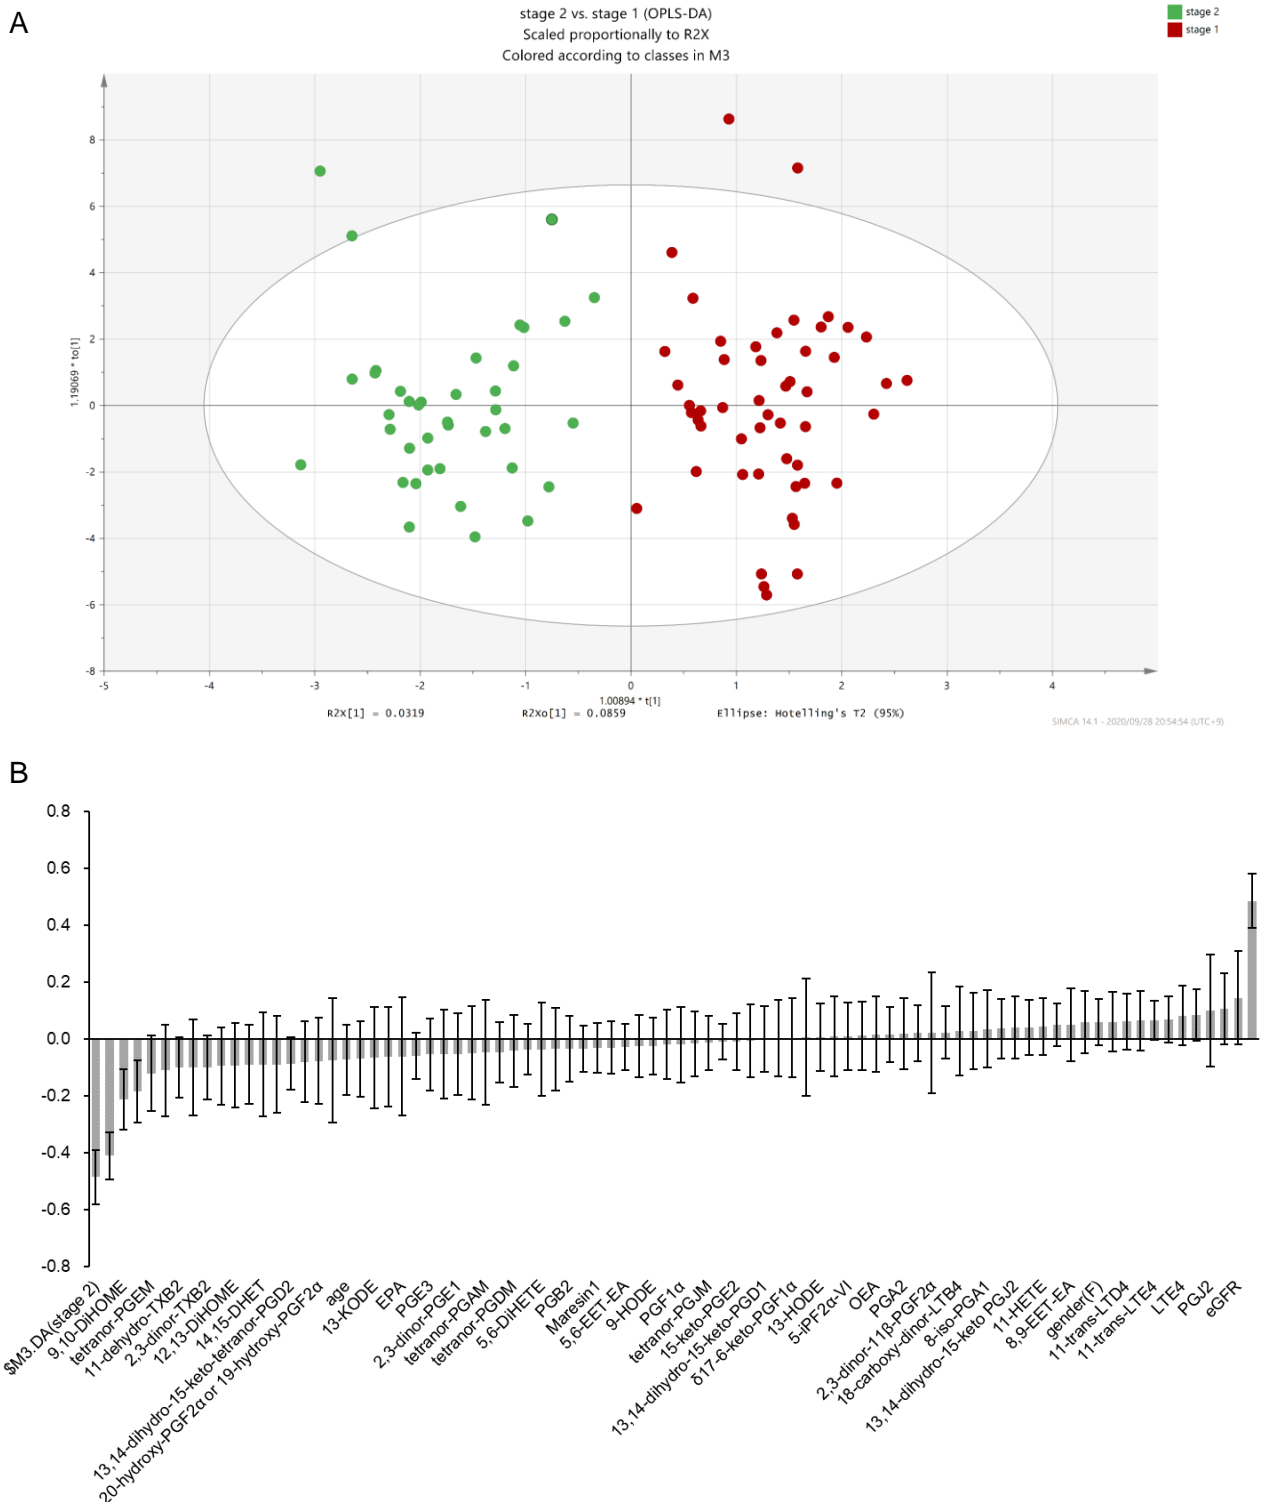

**Figure S5. OPLS analysis for metabolites with variable importance in projection in stage 2 nephropathy group versus stage 1 nephropathy group.** Score scatter plot (A) and loading column plot (B) between stage 2 nephropathy group (closed green circle) and stage 1 nephropathy group (closed red circle) were shown.

Fig. S6

A

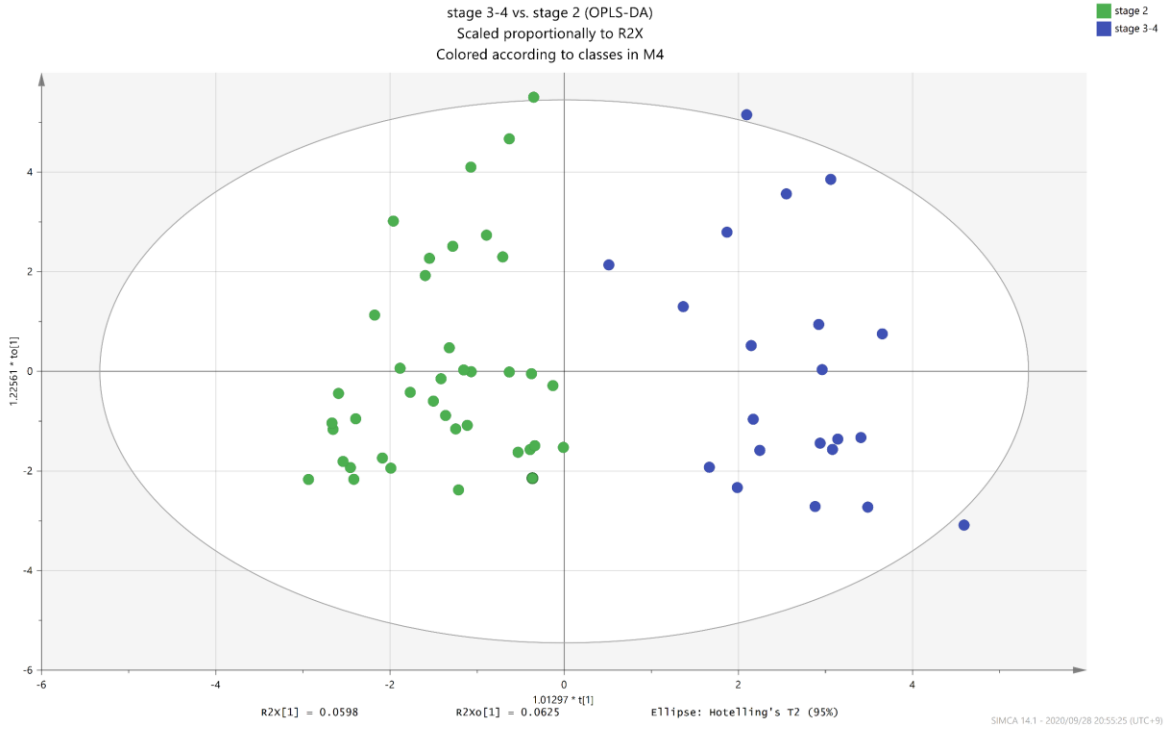

B

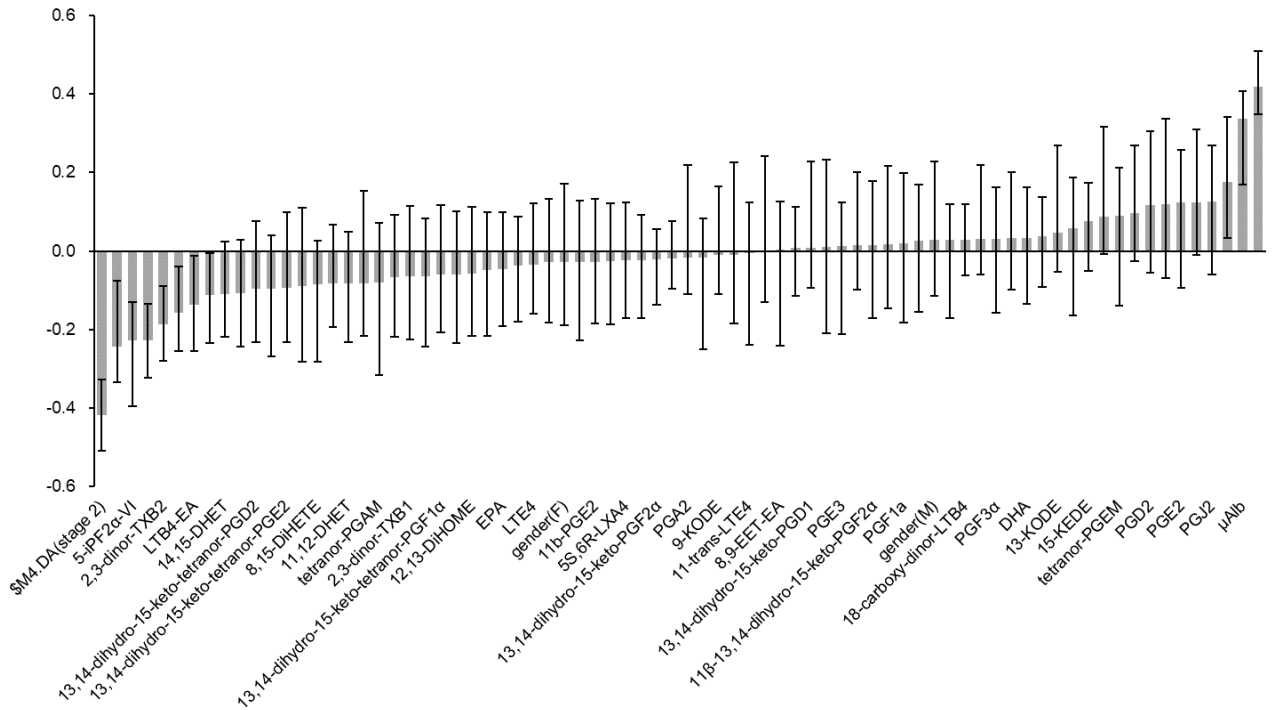

**Figure S6. OPLS analysis for metabolites with variable importance in projection in stage 3-4 nephropathy group versus stage 2 nephropathy group.** Score scatter plot (A) and loading column plot (B) between stage 3-4 nephropathy group (closed blue circle) and stage 2 nephropathy group (closed green circle) were shown.

Fig. S7

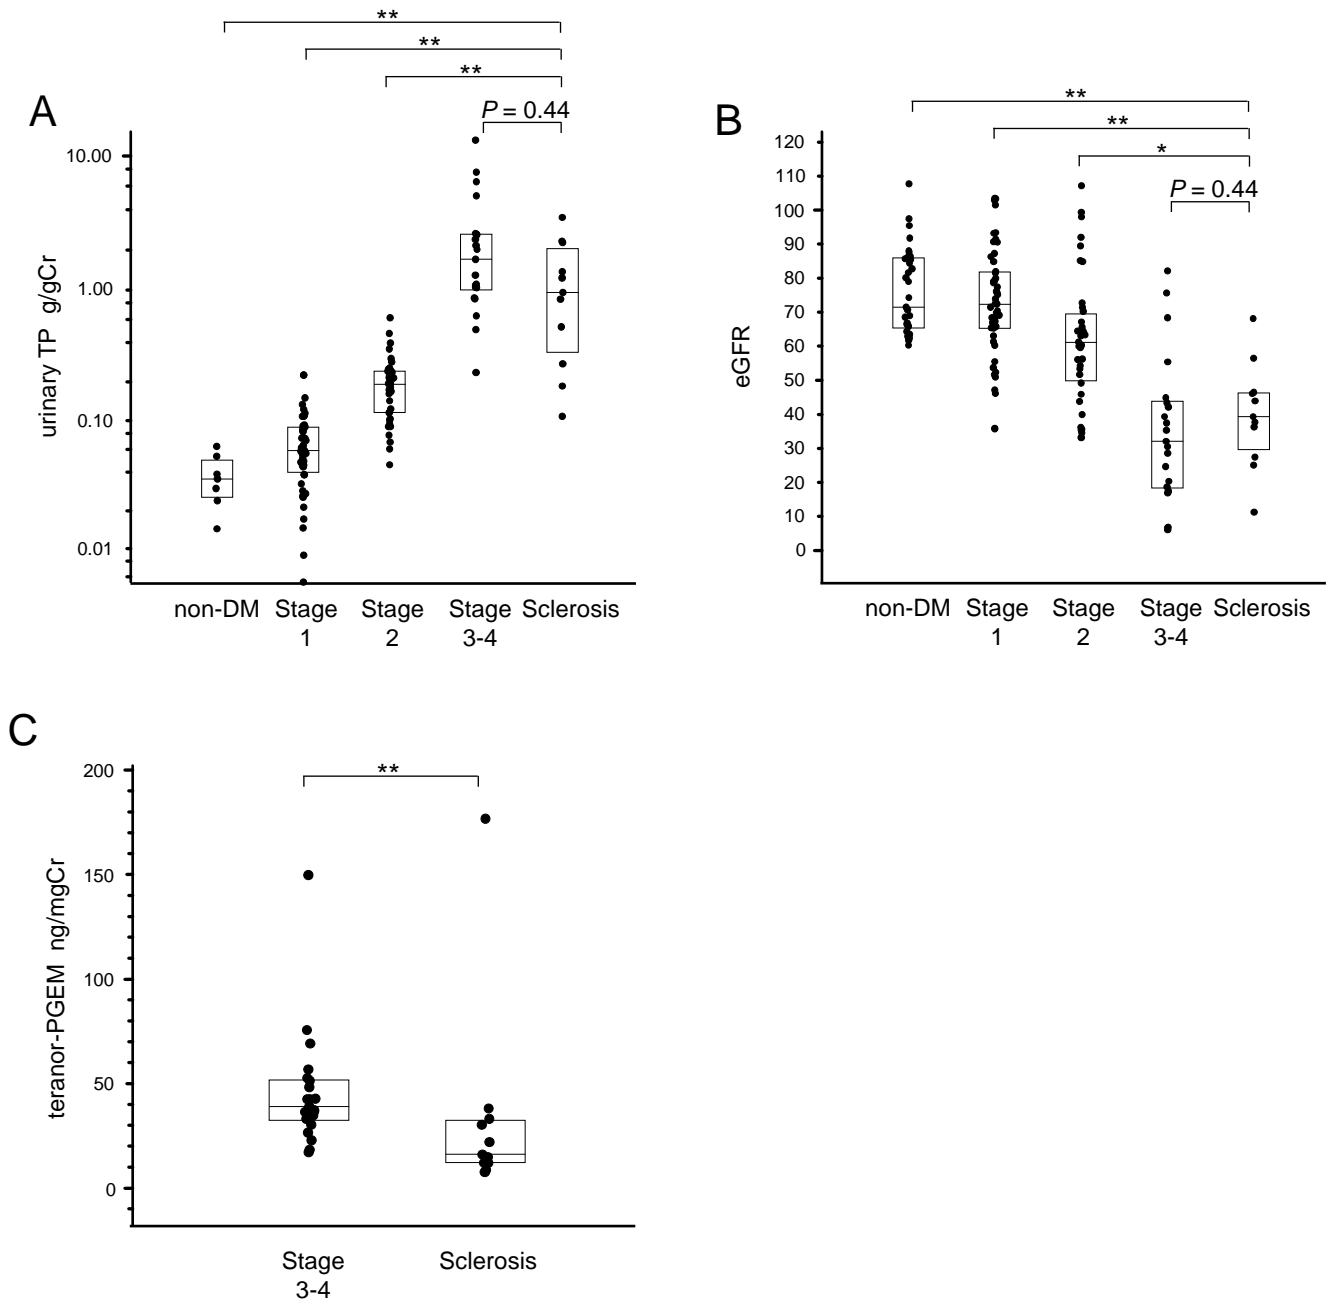

**Figure S7. Comparison of the urinary tetranor-PGEM in subjects with diabetic nephropathy and renal sclerosis.** We compared the levels of urinary TP (A) and eGFR (B) among the subjects with diabetic nephropathy and renal sclerosis. (C) The levels of urinary tetranor-PGEM were compared between the stage 3-4 nephropathy and sclerosis. Data are shown as the median  $\pm$  SE, \* $P < 0.05$ , \*\* $P < 0.01$ .

Fig. S8

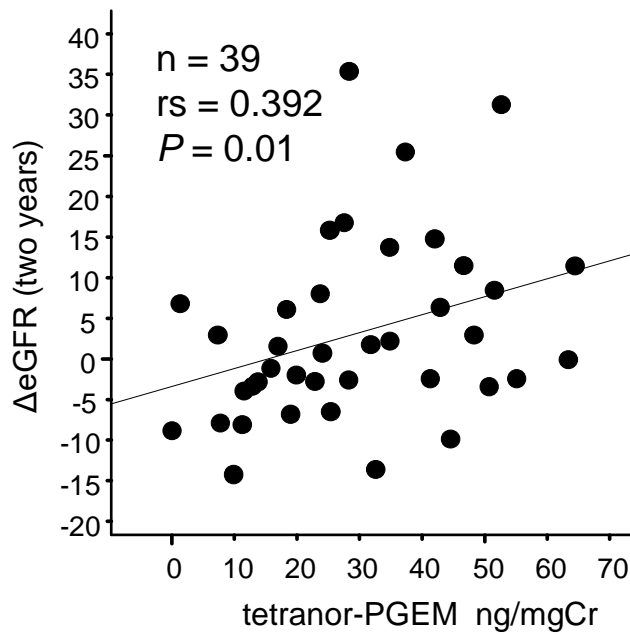

**Figure S8. Association between urinary tetranor-PGEM and the decline in eGFR level.** Correlation analyses between urinary tetranor-PGEM and the decline in eGFR level for two years were performed. The Spearman's rank correlation coefficient is shown.

Fig. S9

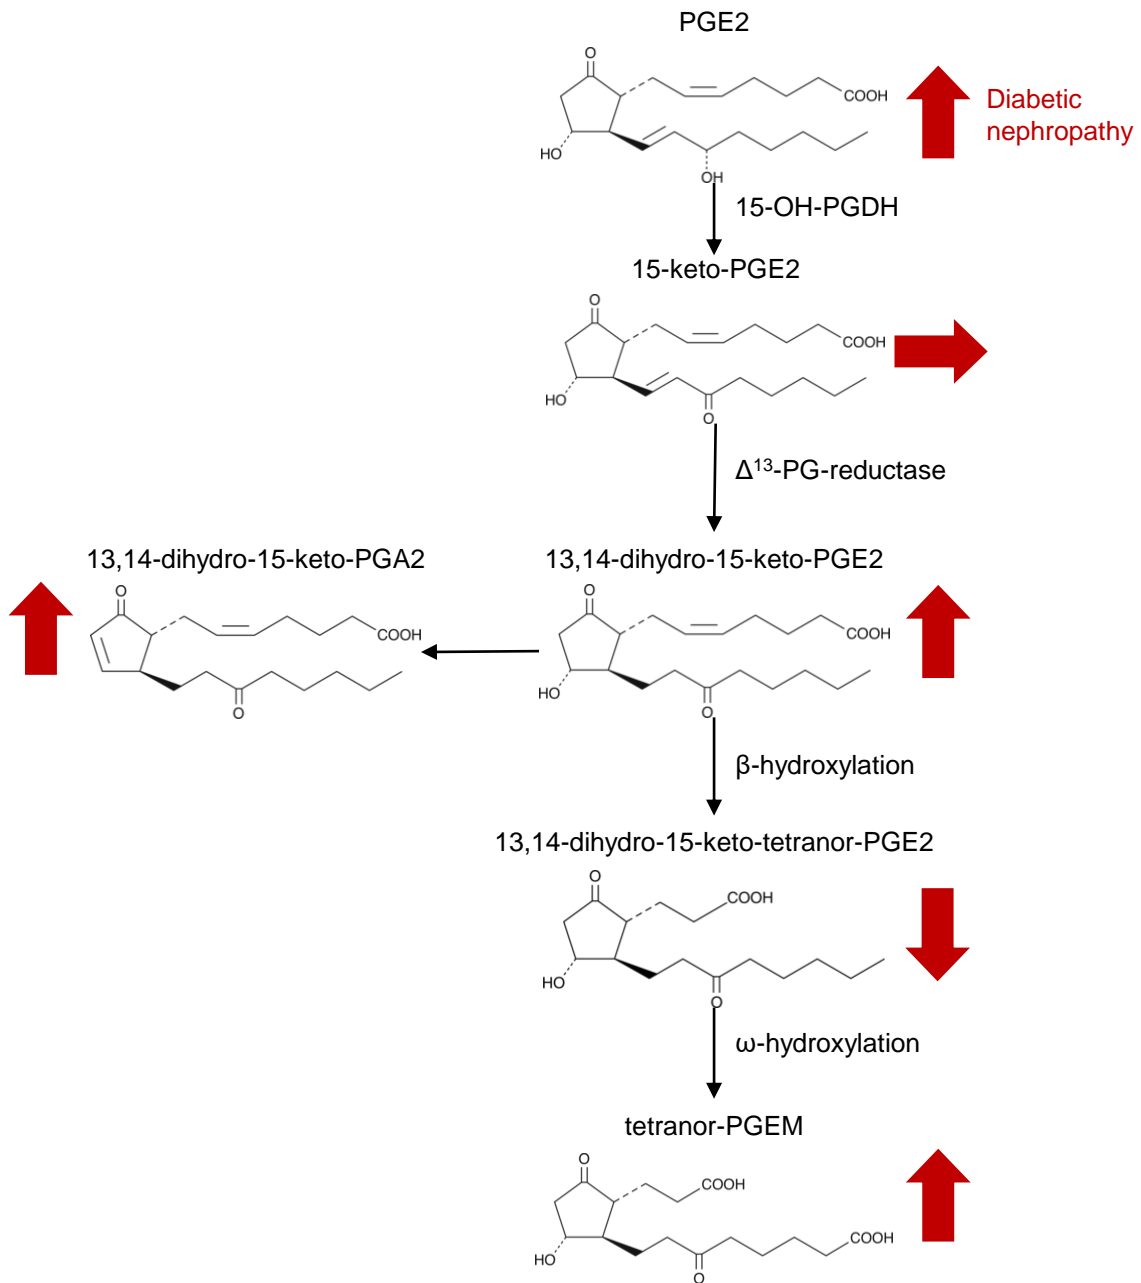

**Figure S9. Schematic figure of prostaglandin E metabolites pathway.** The metabolic pathway of prostaglandin E (PGE) were shown. Red arrows show the modulation of urinary PGE2 and its metabolites in the subjects with diabetic nephropathy.
